# Supplementary material for: Coordination-induced emission enhancement in copper(i) iodide coordination polymers supported by 2-(alkylsulfanyl)pyrimidines
Source: Royal Society of Chemistry journal article supplement (doi:10.1039/d1dt00826a), 2021-01-01
Supplement: d1dt00826a1.pdf [file d1dt00826a1.pdf]

*Electronic Supplementary Information*

## **Coordination-induced emission enhancement in copper(I) iodide coordination polymers supported by 2-(alkylsulfanyl)pyrimidines**

Katerina A. Vinogradova,<sup>\*a</sup> Nikita A. Shekhovtsov,<sup>\*a</sup> Alexey S. Berezin,<sup>a</sup> Taisiya S. Sukhikh,<sup>a</sup>  
Maxim I. Rogovoy,<sup>a</sup> Alexander V. Artem'ev<sup>a</sup> and Mark B. Bushuev<sup>\*a</sup>

<sup>a</sup> *Nikolaev Institute of Inorganic Chemistry, Siberian Branch of Russian Academy of Sciences, 3, Acad. Lavrentiev Ave., Novosibirsk, 630090, Russia. E-mail addresses: vinogradova@niic.nsc.ru (Katerina A. Vinogradova), shna1998@mail.ru (Nikita A. Shekhovtsov), bushuev@niic.nsc.ru (Mark B. Bushuev). Fax: +7 383 330 94 89; Tel: +7 383 316 51 43.*

## Table of Contents

|                |    |
|----------------|----|
| Figure S1..... | 4  |
| Figure S2..... | 5  |
| Figure S3..... | 6  |
| Figure S4..... | 6  |
| Figure S5..... | 6  |
| Table S1.....  | 7  |
| Table S2.....  | 8  |
| Table S3.....  | 10 |
| Table S4.....  | 13 |
| Table S5.....  | 16 |
| Table S6.....  | 20 |
| Table S7.....  | 20 |
| Figure S6..... | 21 |
| Figure S7..... | 21 |
| Table S8.....  | 21 |
| Table S9.....  | 23 |
| Table S10..... | 24 |
| Table S11..... | 24 |
| Table S12..... | 26 |
| Table S13..... | 27 |
| Table S14..... | 27 |
| Table S15..... | 28 |
| Table S16..... | 30 |
| Table S17..... | 30 |
| Table S18..... | 31 |
| Table S19..... | 31 |
| Table S20..... | 31 |
| Table S21..... | 32 |
| Table S22..... | 32 |
| Table S23..... | 33 |
| Table S24..... | 33 |
| Table S25..... | 33 |
| Table S26..... | 34 |
| Table S27..... | 34 |
| Table S28..... | 35 |

|                  |    |
|------------------|----|
| Table S29 .....  | 35 |
| Figure S8 .....  | 36 |
| Figure S9 .....  | 37 |
| Table S30 .....  | 38 |
| Figure S10 ..... | 39 |
| Figure S11 ..... | 39 |
| Table S31 .....  | 40 |
| Figure S12 ..... | 41 |
| Figure S13 ..... | 41 |
| Table S32 .....  | 42 |
| Figure S14 ..... | 43 |
| Figure S15 ..... | 43 |
| Figure S16 ..... | 44 |
| Figure S17 ..... | 44 |
| Figure S18 ..... | 44 |
| Figure S19 ..... | 45 |
| Figure S20 ..... | 46 |
| Figure S21 ..... | 47 |
| Figure S22 ..... | 48 |

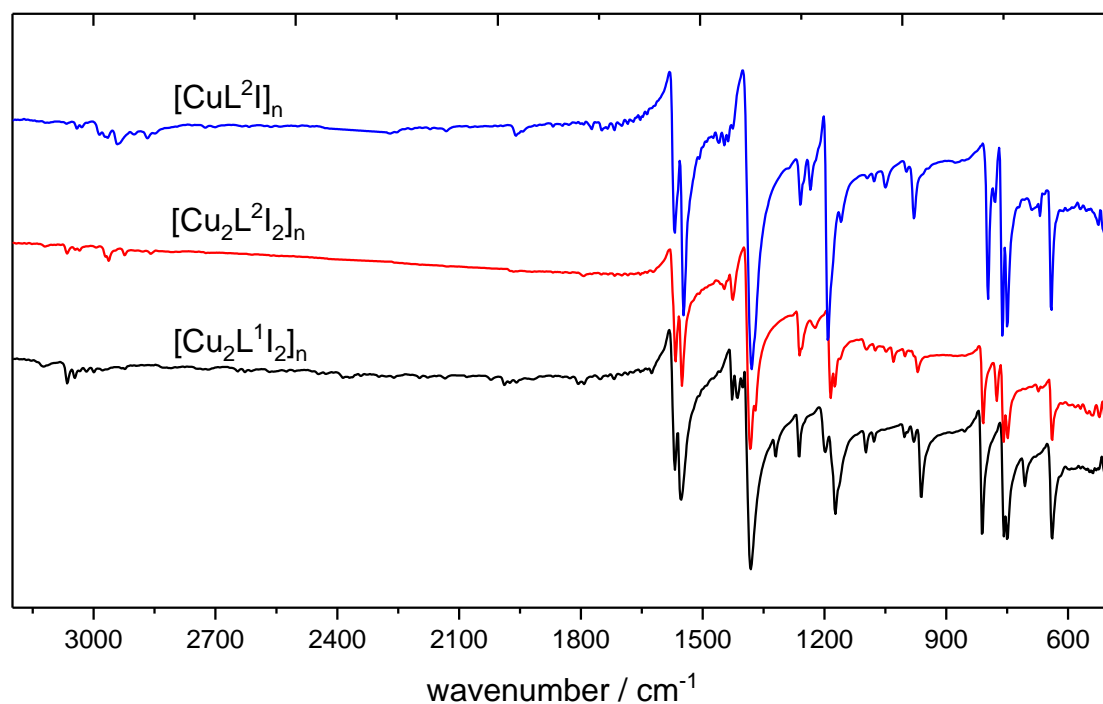

Figure S1. IR spectra of the complexes.

In the region  $3100 - 2850 \text{ cm}^{-1}$ , weak bands to the left of  $3000 \text{ cm}^{-1}$  can be attributed to  $\nu(\text{C-H})$  vibrations of the pyrimidine ring, whereas those to the left of  $3000 \text{ cm}^{-1}$  belong to  $\nu(\text{C-H})$  vibrations of the alkyl groups. Intense bands in the  $1570 - 1545 \text{ cm}^{-1}$  range can be assigned to the stretching vibrations of the pyrimidine ring.<sup>S1</sup> Although it is difficult to assign bands in the fingerprint region ( $1450 \text{ cm}^{-1}$  and below, C-C and C-S stretching vibrations and deformation vibrations of various groups), a weak band at  $1320 \text{ cm}^{-1}$  in the spectrum of  $[\text{Cu}_2\text{L}^1\text{I}_2]_n$ , which is absent in the spectrum of the complexes with  $\text{L}^2$ , is informative of the  $\nu(\text{S-CH}_3)$  vibrations.<sup>S2</sup>

S1 S. Breda, I.D. Reva, L. Lapinski, M.J. Nowak and R. Fausto, *J. Mol. Struct.*, 2006, **786**, 193–206.

S2 K. Nakanishi, *Infrared Absorption Spectroscopy*, Holden-Day, Inc., San Francisco and Nankodo Company limited, Tokyo, 1962.

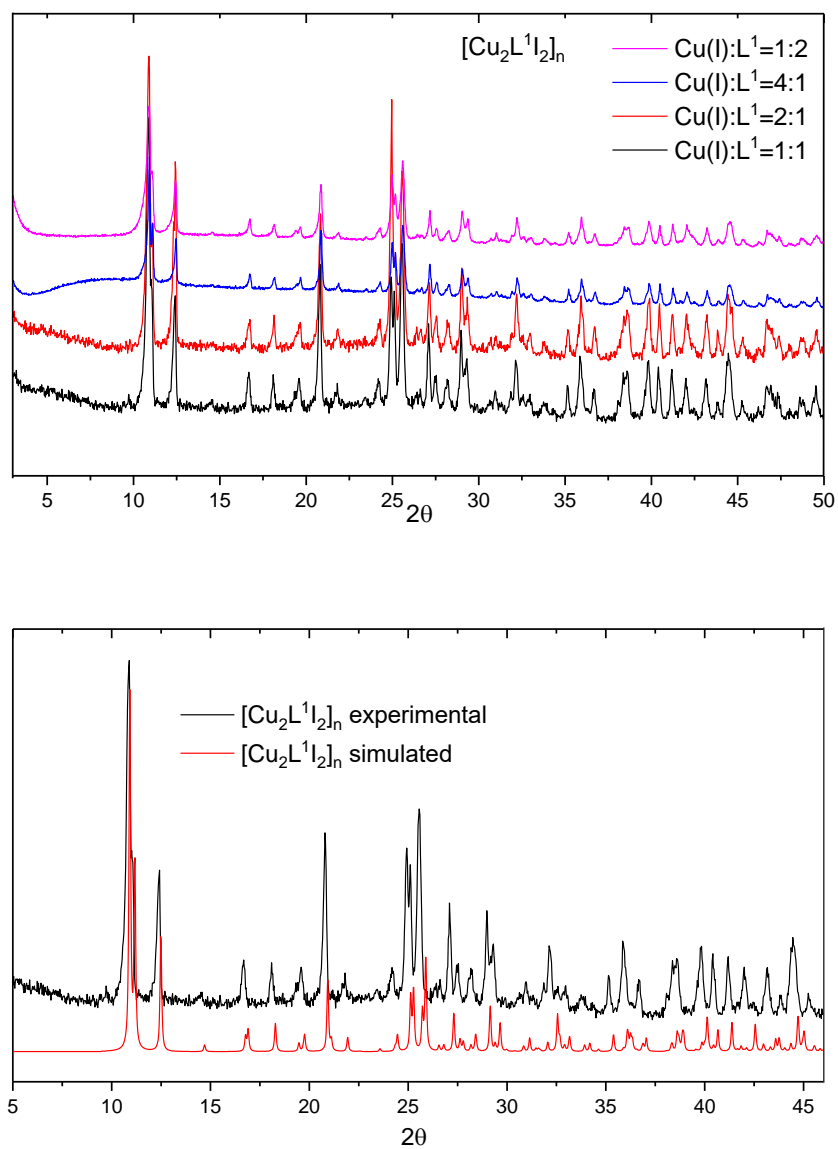

Figure S2. X-ray powder diffraction patterns of  $[\text{Cu}_2\text{L}^1\text{I}_2]_n$ .

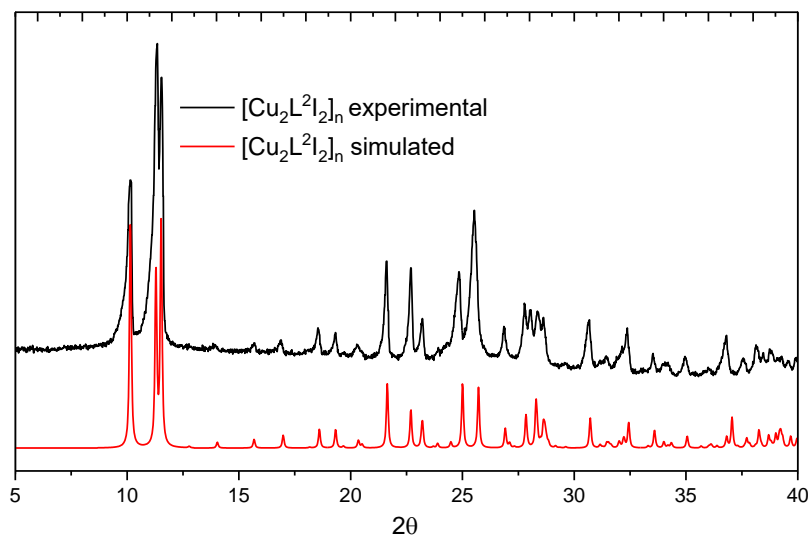

Figure S3. X-ray powder diffraction patterns of  $[\text{Cu}_2\text{L}^2\text{I}_2]_n$ .

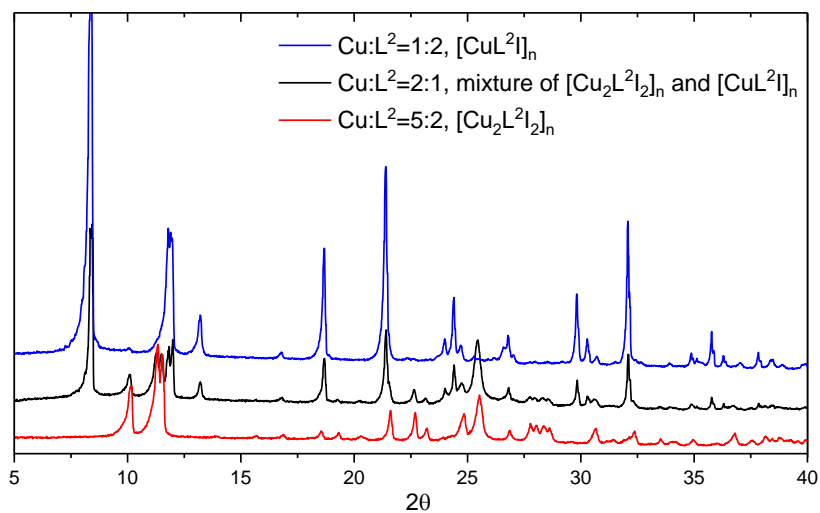

Figure S4. X-ray powder diffraction patterns of  $[\text{Cu}_2\text{L}^2\text{I}_2]_n$ ,  $[\text{CuL}^2\text{I}]_n$  and their mixture.

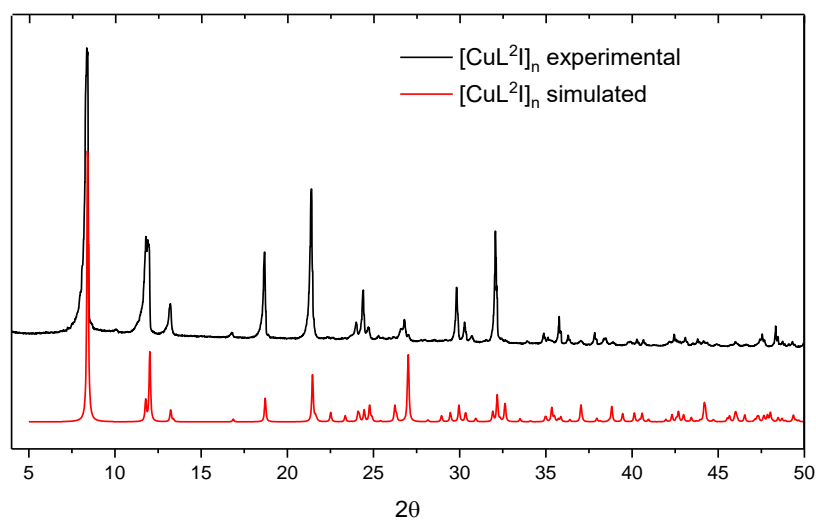

Figure S5. X-ray powder diffraction patterns of  $[\text{CuL}^2\text{I}]_n$ .

Table S1. Crystallographic data of the complexes  $[\text{Cu}_2\text{L}^1\text{I}_2]_n$ ,  $[\text{Cu}_2\text{L}^2\text{I}_2]_n$  and  $[\text{CuL}^2\text{I}]_n$ .

| Identification code                            | $[\text{Cu}_2\text{L}^1\text{I}_2]_n$                         | $[\text{Cu}_2\text{L}^2\text{I}_2]_n$                         | $[\text{CuL}^2\text{I}]_n$                                    |
|------------------------------------------------|---------------------------------------------------------------|---------------------------------------------------------------|---------------------------------------------------------------|
| Empirical formula                              | $\text{C}_5\text{H}_6\text{Cu}_2\text{I}_2\text{N}_2\text{S}$ | $\text{C}_6\text{H}_8\text{Cu}_2\text{I}_2\text{N}_2\text{S}$ | $\text{C}_6\text{H}_8\text{CuIN}_2\text{S}$                   |
| Formula weight                                 | 507.06                                                        | 521.08                                                        | 330.64                                                        |
| Space group                                    | $P\bar{1}$                                                    | $P\bar{1}$                                                    | $P2_1/c$                                                      |
| a/Å                                            | 7.6410(4)                                                     | 7.5758(6)                                                     | 4.1293(4)                                                     |
| b/Å                                            | 8.5752(4)                                                     | 9.4445(9)                                                     | 15.0107(13)                                                   |
| c/Å                                            | 9.4222(5)                                                     | 9.9008(8)                                                     | 14.8554(13)                                                   |
| $\alpha/^\circ$                                | 67.325(2)                                                     | 61.958(3)                                                     | 90                                                            |
| $\beta/^\circ$                                 | 67.177(2)                                                     | 82.979(3)                                                     | 97.948(3)                                                     |
| $\gamma/^\circ$                                | 81.785(2)                                                     | 66.443(2)                                                     | 90                                                            |
| Volume/Å <sup>3</sup>                          | 525.04(5)                                                     | 571.24(9)                                                     | 911.95(14)                                                    |
| Z                                              | 2                                                             | 2                                                             | 4                                                             |
| $\rho_{\text{calc}}/\text{cm}^3$               | 3.207                                                         | 3.029                                                         | 2.408                                                         |
| $\mu/\text{mm}^{-1}$                           | 10.076                                                        | 9.266                                                         | 5.946                                                         |
| F(000)                                         | 460.0                                                         | 476.0                                                         | 624.0                                                         |
| Crystal size/mm <sup>3</sup>                   | 0.35 × 0.29 × 0.1                                             | 0.13 × 0.12 × 0.12                                            | 0.28 × 0.05 × 0.05                                            |
| 2 $\theta$ range for data collection/ $^\circ$ | 5.148 to 54.42                                                | 4.676 to 54.456                                               | 2.714 to 56.208                                               |
| Index ranges                                   | $-9 \leq h \leq 9, -9 \leq k \leq 10, -12 \leq l \leq 12$     | $-9 \leq h \leq 9, -12 \leq k \leq 9, -12 \leq l \leq 11$     | $-4 \leq h \leq 5, -19 \leq k \leq 19, -19 \leq l \leq 12$    |
| Reflections collected                          | 6767                                                          | 5668                                                          | 10024                                                         |
| Independent reflections                        | 2317 [ $R_{\text{int}} = 0.0283, R_{\text{sigma}} = 0.0280$ ] | 2468 [ $R_{\text{int}} = 0.0207, R_{\text{sigma}} = 0.0275$ ] | 2167 [ $R_{\text{int}} = 0.0320, R_{\text{sigma}} = 0.0257$ ] |
| Restraints/parameters                          | 0/110                                                         | 0/119                                                         | 0/102                                                         |
| Goodness-of-fit on $F^2$                       | 1.245                                                         | 1.072                                                         | 1.055                                                         |
| Final R indexes [ $I \geq 2\sigma(I)$ ]        | $R_1 = 0.0215, wR_2 = 0.0538$                                 | $R_1 = 0.0203, wR_2 = 0.0404$                                 | $R_1 = 0.0190, wR_2 = 0.0461$                                 |
| Final R indexes [all data]                     | $R_1 = 0.0221, wR_2 = 0.0541$                                 | $R_1 = 0.0229, wR_2 = 0.0415$                                 | $R_1 = 0.0196, wR_2 = 0.0464$                                 |
| Largest diff. peak/hole / e Å <sup>-3</sup>    | 0.72/-1.48                                                    | 0.60/-0.66                                                    | 1.28/-0.47                                                    |

**Table S2.** A search of CCDC structures (CSD version 5.41, Mar 2020) containing  $(\text{Cu}_2\text{I})_n$  ribbons. Dihedral angles between  $\{\text{Cu}_2\text{I}\}$  planes (deg.) as well as Cu–I and Cu...Cu distances (Å) in  $\{\text{Cu}_2\text{I}_2\}$  quadrangles and ligand type are listed. *m* is for supporting ligands that do not bind Cu atoms in a ribbon; *b* is for ligands that bridge Cu atoms in a ribbon. Note that bridging ligands connecting only adjacent ribbons are assigned *m*-type. The cases where ligand type is *m*, but the dihedral angle is far from 180°, are highlighted yellow.

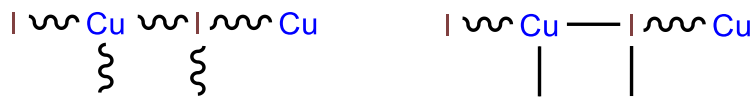

Queries used were:  $\text{Cu} - \text{I} - \text{Cu} - \text{I}$  ,  $\text{Cu} - \text{I} - \text{Cu} - \text{I}$  ,

ignoring structures with further coordination Cu and I atoms (e.g. cubane-like structures and triple ribbons). The total number of structures ignoring retaken ones was 47. Most of them present almost flat  $\{\text{Cu}_2\text{I}_2\}$  quadrangles with the dihedral angle greater than 175°. 14 structures reveal both flat (>175°) and folded (<175°)  $\{\text{Cu}_2\text{I}_2\}$  fragments, while 3 structures (viz. DIVKUQ, DUFHAP and RUPTED) exhibit only folded fragments. Cu–I bonds range from 2.56 to 2.88 Å, while Cu...Cu distances range from 2.61 to 3.76 Å; no correlation between these distances and the dihedral angle was found. No correlation between Cu...Cu distance and ligand type was also found.

| Index | Refcode  | ligand type | dihedral angle | Cu–I | Cu...Cu | Index | Refcode  | ligand type | dihedral angle | Cu–I | Cu...Cu |
|-------|----------|-------------|----------------|------|---------|-------|----------|-------------|----------------|------|---------|
| 1     | ACIGAX   | <i>m</i>    | 180.00         | 2.73 | 3.21    | 64    | MRHCUI   | <i>m</i>    | 180.00         | 2.67 | 2.96    |
| 2     | ACIGAX   | <i>m</i>    | 180.00         | 2.73 | 2.92    | 65    | MUHQOV   | <i>m</i>    | 180.00         | 2.73 | 3.41    |
| 3     | AGIYEU01 | <i>m</i>    | 180.00         | 2.65 | 2.76    | 66    | MUHQOV   | <i>m</i>    | 180.00         | 2.64 | 2.78    |
| 4     | AGIYEU01 | <i>m</i>    | 180.00         | 2.61 | 2.76    | 67    | MUHQOV01 | <i>m</i>    | 180.00         | 2.67 | 2.80    |
| 5     | AGIYEU02 | <i>m</i>    | 180.00         | 2.66 | 2.79    | 68    | MUHQOV01 | <i>m</i>    | 180.00         | 2.74 | 3.41    |
| 6     | AYELOH   | <i>m</i>    | 180.00         | 2.56 | 2.75    | 69    | NEKXAD   | <i>m</i>    | 180.00         | 2.69 | 3.33    |
| 7     | AYELOH   | <i>m</i>    | 180.00         | 2.76 | 2.87    | 70    | OMIHEX   | <i>m</i>    | 179.30         | 2.64 | 2.85    |
| 8     | AYELOH   | <i>m</i>    | 175.77         | 2.71 | 3.12    | 71    | ONAXUX   | <i>b</i>    | 180.00         | 2.76 | 3.52    |
| 9     | BIGLUY   | <i>b</i>    | 180.00         | 2.59 | 2.62    | 72    | ONAXUX   | <i>b</i>    | 155.60         | 2.76 | 3.52    |
| 10    | BIGLUY   | <i>b</i>    | 180.00         | 2.58 | 2.61    | 73    | ORUSAW   | <i>m</i>    | 180.00         | 2.67 | 3.36    |
| 11    | BIGLUY   | <i>b</i>    | 131.43         | 2.74 | 2.76    | 74    | ORUSAW   | <i>m</i>    | 180.00         | 2.67 | 2.76    |
| 12    | BUWJIN   | <i>b</i>    | 180.00         | 2.71 | 3.32    | 75    | QALNOJ   | <i>m</i>    | 180.00         | 2.66 | 2.69    |
| 13    | BUWJIN   | <i>b</i>    | 180.00         | 2.70 | 3.76    | 76    | QALNOJ   | <i>m</i>    | 180.00         | 2.61 | 3.00    |
| 14    | BUWJIN   | <i>b</i>    | 164.17         | 2.71 | 3.55    | 77    | QEZBEF   | <i>b</i>    | 180.00         | 2.62 | 2.79    |
| 15    | CAJQOT   | <i>m</i>    | 180.00         | 2.63 | 3.44    | 78    | QEZBEF   | <i>b</i>    | 145.81         | 2.62 | 2.79    |
| 16    | CAJQOT   | <i>m</i>    | 180.00         | 2.77 | 2.89    | 79    | REJCAL   | <i>b</i>    | 180.00         | 2.68 | 2.80    |
| 17    | CAJQOT   | <i>m</i>    | 172.03         | 2.68 | 2.92    | 80    | REJCAL   | <i>b</i>    | 164.96         | 2.68 | 2.80    |
| 18    | CEPFOS   | <i>m</i>    | 180.00         | 2.65 | 2.65    | 81    | RIWXIF   | <i>b</i>    | 180.00         | 2.69 | 2.64    |
| 19    | CEPFOS   | <i>m</i>    | 180.00         | 2.74 | 3.56    | 82    | RIWXIF   | <i>b</i>    | 180.00         | 2.63 | 2.72    |
| 20    | CEZBEQ   | <i>m</i>    | 180.00         | 2.63 | 2.77    | 83    | RIWXIF   | <i>b</i>    | 145.62         | 2.69 | 2.88    |
| 21    | CEZBEQ   | <i>m</i>    | 180.00         | 2.68 | 2.73    | 84    | RUPTED   | <i>m</i>    | 158.25         | 2.66 | 2.69    |
| 22    | CUIPYS   | <i>m</i>    | 179.27         | 2.64 | 2.87    | 85    | RUPTED   | <i>m</i>    | 157.41         | 2.66 | 2.69    |
| 23    | DIVKUQ   | <i>m</i>    | 150.43         | 2.69 | 2.94    | 86    | SAWTOZ   | <i>m</i>    | 180.00         | 2.77 | 2.91    |
| 24    | DIVKUQ   | <i>m</i>    | 144.60         | 2.63 | 2.80    | 87    | TAWKUZ   | <i>b</i>    | 180.00         | 2.67 | 2.72    |
| 25    | DUFHAP   | <i>b</i>    | 151.32         | 2.64 | 2.81    | 88    | TAWKUZ   | <i>b</i>    | 180.00         | 2.62 | 2.76    |
| 26    | DUFHAP   | <i>b</i>    | 137.62         | 2.65 | 2.64    | 89    | TAWKUZ   | <i>b</i>    | 137.05         | 2.72 | 2.84    |
| 27    | ECEVIS   | <i>m</i>    | 180.00         | 2.74 | 3.54    | 90    | TIYZOT   | <i>b</i>    | 180.00         | 2.67 | 2.78    |
| 28    | ECEVIS   | <i>m</i>    | 180.00         | 2.66 | 3.08    | 91    | TIYZOT   | <i>b</i>    | 180.00         | 2.71 | 3.65    |
| 29    | ECEVIS   | <i>m</i>    | 170.52         | 2.65 | 2.86    | 92    | TIYZOT   | <i>b</i>    | 163.86         | 2.67 | 2.78    |



|    |          |          |        |      |      |     |          |          |        |      |      |
|----|----------|----------|--------|------|------|-----|----------|----------|--------|------|------|
| 30 | FALYEW   | <i>m</i> | 180.00 | 2.68 | 2.71 | 93  | TIYZOT   | <i>b</i> | 162.50 | 2.71 | 3.65 |
| 31 | FALYIA   | <i>m</i> | 180.00 | 2.78 | 3.60 | 94  | TIYZOT01 | <i>b</i> | 180.00 | 2.67 | 2.73 |
| 32 | FOLBAJ   | <i>m</i> | 180.00 | 2.74 | 2.96 | 95  | TIYZOT01 | <i>b</i> | 165.64 | 2.70 | 3.63 |
| 33 | GUYQAU   | <i>m</i> | 179.62 | 2.70 | 3.13 | 96  | TIYZOT01 | <i>b</i> | 162.76 | 2.70 | 3.63 |
| 34 | GUYQAU   | <i>m</i> | 179.41 | 2.71 | 3.21 | 97  | TOKGAB   | <i>m</i> | 179.70 | 2.65 | 2.90 |
| 35 | HALZAW   | <i>m</i> | 180.00 | 2.68 | 2.93 | 98  | VEVGUY   | <i>m</i> | 179.36 | 2.76 | 3.51 |
| 36 | HALZAW   | <i>m</i> | 178.48 | 2.66 | 2.96 | 99  | VEVGUY   | <i>m</i> | 177.91 | 2.70 | 2.79 |
| 37 | HUJHID   | <i>m</i> | 179.97 | 2.67 | 2.82 | 100 | VEYJUE   | <i>m</i> | 180.00 | 2.71 | 3.21 |
| 38 | HUJHUP   | <i>m</i> | 180.00 | 2.63 | 2.70 | 101 | VIXBEK   | <i>m</i> | 178.10 | 2.75 | 2.83 |
| 39 | HUJHUP   | <i>m</i> | 180.00 | 2.69 | 2.76 | 102 | WEMDAU   | <i>m</i> | 180.00 | 2.74 | 3.17 |
| 40 | HUJHUP01 | <i>m</i> | 180.00 | 2.63 | 2.72 | 103 | XAKNED   | <i>m</i> | 180.00 | 2.61 | 2.73 |
| 41 | HUJHUP01 | <i>m</i> | 180.00 | 2.69 | 2.78 | 104 | XAKNED   | <i>m</i> | 180.00 | 2.61 | 2.65 |
| 42 | JULWOE   | <i>m</i> | 179.27 | 2.62 | 3.17 | 105 | XAKNED   | <i>m</i> | 180.00 | 2.65 | 3.03 |
| 43 | JULWOE   | <i>m</i> | 179.17 | 2.69 | 2.80 | 106 | XAKNED   | <i>m</i> | 167.89 | 2.76 | 3.19 |
| 44 | KALNOA   | <i>m</i> | 180.00 | 2.68 | 2.82 | 107 | XIHFAV   | <i>m</i> | 180.00 | 2.66 | 2.86 |
| 45 | KAWGOG   | <i>b</i> | 180.00 | 2.69 | 2.91 | 108 | XIHFAV   | <i>m</i> | 180.00 | 2.66 | 2.87 |
| 46 | KAWGOG   | <i>b</i> | 180.00 | 2.71 | 2.90 | 109 | ZEBNUP   | <i>m</i> | 180.00 | 2.63 | 2.85 |
| 47 | KAWGOG   | <i>b</i> | 153.76 | 2.69 | 2.91 | 110 | ZEBNUP   | <i>m</i> | 180.00 | 2.65 | 2.78 |
| 48 | KAWGOG   | <i>b</i> | 145.23 | 2.71 | 2.90 | 111 | ZEBNUP   | <i>m</i> | 177.48 | 2.62 | 2.77 |
| 49 | LAGVAS   | <i>m</i> | 178.80 | 2.61 | 2.79 | 112 | ZGRIM01  | <i>m</i> | 180.00 | 2.66 | 3.12 |
| 50 | LAGVAS   | <i>m</i> | 178.47 | 2.66 | 3.00 | 113 | ZGRIM02  | <i>m</i> | 180.00 | 2.65 | 3.01 |
| 51 | LIGGOA   | <i>b</i> | 180.00 | 2.65 | 3.43 | 114 | ZGRIM03  | <i>m</i> | 180.00 | 2.64 | 3.01 |
| 52 | LIGGOA   | <i>b</i> | 152.71 | 2.72 | 2.72 | 115 | ZGRIM10  | <i>m</i> | 178.95 | 2.64 | 3.02 |
| 53 | LUZQAA   | <i>b</i> | 180.00 | 2.67 | 2.84 |     |          |          |        |      |      |
| 54 | LUZQAA   | <i>b</i> | 180.00 | 2.67 | 2.94 |     |          |          |        |      |      |
| 55 | LUZQAA   | <i>b</i> | 179.89 | 2.61 | 3.12 |     |          |          |        |      |      |
| 56 | LUZQAA   | <i>b</i> | 179.02 | 2.70 | 3.15 |     |          |          |        |      |      |
| 57 | LUZQAA   | <i>b</i> | 178.58 | 2.60 | 3.01 |     |          |          |        |      |      |
| 58 | LUZQAA   | <i>b</i> | 174.87 | 2.67 | 2.92 |     |          |          |        |      |      |
| 59 | LUZQAA   | <i>b</i> | 174.58 | 2.88 | 3.63 |     |          |          |        |      |      |
| 60 | LUZQAA   | <i>b</i> | 174.30 | 2.71 | 3.65 |     |          |          |        |      |      |
| 61 | LUZQAA   | <i>b</i> | 171.15 | 2.85 | 3.67 |     |          |          |        |      |      |
| 62 | LUZQAA   | <i>b</i> | 170.90 | 2.62 | 3.73 |     |          |          |        |      |      |
| 63 | LUZQAA   | <i>b</i> | 169.04 | 2.73 | 3.72 |     |          |          |        |      |      |

**Table S3.** Gas phase geometries of the model  $\{\text{Cu}_8\text{I}_8(\text{L}^1)_4\}$  (the complex  $[\text{Cu}_2\text{L}^1\text{I}_2]_n$ ) in Cartesian (XYZ) coordinates as calculated in Gaussian software at the B3LYP/LANL2DZ/D95V level of theory.

| Ground state ( $S_0$ ) |                 |                 |                 |
|------------------------|-----------------|-----------------|-----------------|
| I                      | 2.808719000000  | -0.803896000000 | -1.891077000000 |
| I                      | 0.837818000000  | 2.158802000000  | 0.252364000000  |
| Cu                     | 1.219430000000  | -0.540472000000 | 0.240286000000  |
| Cu                     | 3.260402000000  | 1.225282000000  | -0.185623000000 |
| S                      | 4.665610000000  | 3.162936000000  | -1.325631000000 |
| N                      | 6.738097000000  | 1.514641000000  | -1.963886000000 |
| N                      | 5.974790000000  | 2.963160000000  | -3.726397000000 |
| C                      | 7.703015000000  | 1.023720000000  | -2.792997000000 |
| H                      | 8.330850000000  | 0.238410000000  | -2.385906000000 |
| C                      | 5.911811000000  | 2.482949000000  | -2.469335000000 |
| C                      | 3.576232000000  | 4.136041000000  | -2.519690000000 |
| H                      | 3.187305000000  | 3.459566000000  | -3.280961000000 |
| H                      | 2.767021000000  | 4.530080000000  | -1.901452000000 |
| H                      | 4.163677000000  | 4.933857000000  | -2.972279000000 |
| C                      | 7.846067000000  | 1.487941000000  | -4.108408000000 |
| H                      | 8.613596000000  | 1.090680000000  | -4.761261000000 |
| C                      | 6.936858000000  | 2.468284000000  | -4.543544000000 |
| H                      | 6.964559000000  | 2.869369000000  | -5.552277000000 |
| I                      | 4.832268000000  | 0.803919000000  | 1.891108000000  |
| I                      | -0.837818000000 | -2.158802000000 | -0.252364000000 |
| Cu                     | -1.219430000000 | 0.540472000000  | -0.240286000000 |
| Cu                     | 6.421260000000  | 0.540928000000  | -0.240070000000 |
| Cu                     | 4.380865000000  | -1.225647000000 | 0.185439000000  |
| N                      | 1.538437000000  | -1.020321000000 | 2.280844000000  |
| I                      | -4.832268000000 | -0.803919000000 | -1.891108000000 |
| I                      | -6.803113000000 | 2.158722000000  | 0.252355000000  |
| Cu                     | -6.421260000000 | -0.540928000000 | 0.240070000000  |
| Cu                     | -4.380865000000 | 1.225647000000  | -0.185439000000 |
| S                      | -3.116315000000 | 3.061879000000  | -1.457647000000 |
| N                      | -1.538437000000 | 1.020321000000  | -2.280844000000 |
| N                      | -2.438739000000 | 2.406199000000  | -4.032321000000 |
| C                      | -0.900594000000 | 0.263807000000  | -3.214179000000 |
| H                      | -0.316703000000 | -0.569525000000 | -2.842096000000 |
| C                      | -2.281287000000 | 2.067833000000  | -2.738295000000 |
| C                      | -4.365591000000 | 4.015587000000  | -2.501714000000 |
| H                      | -4.978750000000 | 3.308745000000  | -3.060818000000 |
| H                      | -4.975451000000 | 4.562599000000  | -1.780144000000 |
| H                      | -3.829955000000 | 4.685927000000  | -3.172989000000 |
| C                      | -1.009319000000 | 0.543676000000  | -4.585922000000 |
| H                      | -0.502770000000 | -0.070080000000 | -5.320879000000 |
| C                      | -1.806021000000 | 1.639276000000  | -4.956180000000 |
| H                      | -1.950665000000 | 1.921160000000  | -5.995013000000 |
| I                      | -2.808719000000 | 0.803896000000  | 1.891077000000  |
| Cu                     | -3.260402000000 | -1.225282000000 | 0.185623000000  |
| N                      | -6.738097000000 | -1.514641000000 | 1.963886000000  |
| I                      | 6.803113000000  | -2.158722000000 | -0.252355000000 |
| S                      | 3.116315000000  | -3.061879000000 | 1.457647000000  |
| N                      | 2.438739000000  | -2.406199000000 | 4.032321000000  |
| C                      | 0.900594000000  | -0.263807000000 | 3.214179000000  |
| H                      | 0.316703000000  | 0.569525000000  | 2.842096000000  |

|   |                 |                 |                |
|---|-----------------|-----------------|----------------|
| C | 2.281287000000  | -2.067833000000 | 2.738295000000 |
| C | 4.365591000000  | -4.015587000000 | 2.501714000000 |
| H | 4.978750000000  | -3.308745000000 | 3.060818000000 |
| H | 4.975451000000  | -4.562599000000 | 1.780144000000 |
| H | 3.829955000000  | -4.685927000000 | 3.172989000000 |
| C | 1.009319000000  | -0.543676000000 | 4.585922000000 |
| H | 0.502770000000  | 0.070080000000  | 5.320879000000 |
| C | 1.806021000000  | -1.639276000000 | 4.956180000000 |
| H | 1.950665000000  | -1.921160000000 | 5.995013000000 |
| S | -4.665610000000 | -3.162936000000 | 1.325631000000 |
| N | -5.974790000000 | -2.963160000000 | 3.726397000000 |
| C | -7.703015000000 | -1.023720000000 | 2.792997000000 |
| H | -8.330850000000 | -0.238410000000 | 2.385906000000 |
| C | -5.911811000000 | -2.482949000000 | 2.469335000000 |
| C | -3.576232000000 | -4.136041000000 | 2.519690000000 |
| H | -3.187305000000 | -3.459566000000 | 3.280961000000 |
| H | -2.767021000000 | -4.530080000000 | 1.901452000000 |
| H | -4.163677000000 | -4.933857000000 | 2.972279000000 |
| C | -7.846067000000 | -1.487941000000 | 4.108408000000 |
| H | -8.613596000000 | -1.090680000000 | 4.761261000000 |
| C | -6.936858000000 | -2.468284000000 | 4.543544000000 |
| H | -6.964559000000 | -2.869369000000 | 5.552277000000 |

**Lowest triplet excited state (T<sub>1</sub>)**

|    |                 |                 |                 |
|----|-----------------|-----------------|-----------------|
| I  | 2.808706000000  | -0.803886000000 | -1.891076000000 |
| I  | 0.837759000000  | 2.158861000000  | 0.252369000000  |
| Cu | 1.219297000000  | -0.540188000000 | 0.240481000000  |
| Cu | 3.260554000000  | 1.225102000000  | -0.185698000000 |
| S  | 4.577153000000  | 3.172531000000  | -1.238175000000 |
| N  | 6.769264000000  | 1.637794000000  | -1.848842000000 |
| N  | 6.041602000000  | 3.192609000000  | -3.543989000000 |
| C  | 7.838627000000  | 1.277917000000  | -2.664166000000 |
| H  | 8.498273000000  | 0.510597000000  | -2.275914000000 |
| C  | 5.935757000000  | 2.606197000000  | -2.357352000000 |
| C  | 3.476223000000  | 4.085360000000  | -2.466595000000 |
| H  | 3.095762000000  | 3.378255000000  | -3.204503000000 |
| H  | 2.663888000000  | 4.508877000000  | -1.872393000000 |
| H  | 4.070757000000  | 4.858945000000  | -2.949967000000 |
| C  | 8.024740000000  | 1.857165000000  | -3.919775000000 |
| H  | 8.861056000000  | 1.560996000000  | -4.543393000000 |
| C  | 7.091677000000  | 2.821769000000  | -4.355688000000 |
| H  | 7.154060000000  | 3.308834000000  | -5.321981000000 |
| I  | 4.832270000000  | 0.803911000000  | 1.891124000000  |
| I  | -0.837759000000 | -2.158861000000 | -0.252369000000 |
| Cu | -1.219297000000 | 0.540188000000  | -0.240481000000 |
| Cu | 6.421194000000  | 0.541050000000  | -0.239991000000 |
| Cu | 4.380890000000  | -1.225764000000 | 0.185286000000  |
| N  | 1.518847000000  | -1.024467000000 | 2.264765000000  |
| I  | -4.832270000000 | -0.803911000000 | -1.891124000000 |
| I  | -6.803108000000 | 2.158718000000  | 0.252345000000  |
| Cu | -6.421194000000 | -0.541050000000 | 0.239991000000  |
| Cu | -4.380890000000 | 1.225764000000  | -0.185286000000 |
| S  | -3.081664000000 | 3.070787000000  | -1.414423000000 |
| N  | -1.518847000000 | 1.024467000000  | -2.264765000000 |

|    |                 |                 |                 |
|----|-----------------|-----------------|-----------------|
| N  | -2.420486000000 | 2.436359000000  | -3.995544000000 |
| C  | -0.892322000000 | 0.271451000000  | -3.217284000000 |
| H  | -0.314525000000 | -0.572864000000 | -2.862576000000 |
| C  | -2.257746000000 | 2.083327000000  | -2.711287000000 |
| C  | -4.310116000000 | 4.068938000000  | -2.441872000000 |
| H  | -4.936093000000 | 3.385588000000  | -3.015414000000 |
| H  | -4.908375000000 | 4.617098000000  | -1.711619000000 |
| H  | -3.757020000000 | 4.738462000000  | -3.099385000000 |
| C  | -1.007736000000 | 0.569893000000  | -4.582261000000 |
| H  | -0.509238000000 | -0.038254000000 | -5.327576000000 |
| C  | -1.797240000000 | 1.677396000000  | -4.938316000000 |
| H  | -1.944837000000 | 1.975142000000  | -5.971659000000 |
| I  | -2.808706000000 | 0.803886000000  | 1.891076000000  |
| Cu | -3.260554000000 | -1.225102000000 | 0.185698000000  |
| N  | -6.769264000000 | -1.637794000000 | 1.848842000000  |
| I  | 6.803108000000  | -2.158718000000 | -0.252345000000 |
| S  | 3.081664000000  | -3.070787000000 | 1.414423000000  |
| N  | 2.420486000000  | -2.436359000000 | 3.995544000000  |
| C  | 0.892322000000  | -0.271451000000 | 3.217284000000  |
| H  | 0.314525000000  | 0.572864000000  | 2.862576000000  |
| C  | 2.257746000000  | -2.083327000000 | 2.711287000000  |
| C  | 4.310116000000  | -4.068938000000 | 2.441872000000  |
| H  | 4.936093000000  | -3.385588000000 | 3.015414000000  |
| H  | 4.908375000000  | -4.617098000000 | 1.711619000000  |
| H  | 3.757020000000  | -4.738462000000 | 3.099385000000  |
| C  | 1.007736000000  | -0.569893000000 | 4.582261000000  |
| H  | 0.509238000000  | 0.038254000000  | 5.327576000000  |
| C  | 1.797240000000  | -1.677396000000 | 4.938316000000  |
| H  | 1.944837000000  | -1.975142000000 | 5.971659000000  |
| S  | -4.577153000000 | -3.172531000000 | 1.238175000000  |
| N  | -6.041602000000 | -3.192609000000 | 3.543989000000  |
| C  | -7.838627000000 | -1.277917000000 | 2.664166000000  |
| H  | -8.498273000000 | -0.510597000000 | 2.275914000000  |
| C  | -5.935757000000 | -2.606197000000 | 2.357352000000  |
| C  | -3.476223000000 | -4.085360000000 | 2.466595000000  |
| H  | -3.095762000000 | -3.378255000000 | 3.204503000000  |
| H  | -2.663888000000 | -4.508877000000 | 1.872393000000  |
| H  | -4.070757000000 | -4.858945000000 | 2.949967000000  |
| C  | -8.024740000000 | -1.857165000000 | 3.919775000000  |
| H  | -8.861056000000 | -1.560996000000 | 4.543393000000  |
| C  | -7.091677000000 | -2.821769000000 | 4.355688000000  |
| H  | -7.154060000000 | -3.308834000000 | 5.321981000000  |

**Table S4.** Gas phase geometries of the model  $\{\text{Cu}_8\text{I}_8(\text{L}^2)_4\}$  (the complex  $[\text{Cu}_2\text{L}^2\text{I}_2]_n$ ) in Cartesian (XYZ) coordinates as calculated in Gaussian software at the B3LYP/LANL2DZ/D95V level of theory.

| <b>Ground state (<math>S_0</math>)</b> |                 |                 |                 |
|----------------------------------------|-----------------|-----------------|-----------------|
| I                                      | 2.793787000000  | -2.062865000000 | 0.081749000000  |
| I                                      | 6.745856000000  | -1.112760000000 | -1.893680000000 |
| Cu                                     | 4.321186000000  | -0.328140000000 | -1.223724000000 |
| Cu                                     | 1.217530000000  | -0.000683000000 | -0.570164000000 |
| S                                      | 3.027339000000  | 0.042648000000  | -3.406870000000 |
| N                                      | 1.513510000000  | 1.663041000000  | -1.854901000000 |
| N                                      | 2.324687000000  | 2.656615000000  | -3.890879000000 |
| C                                      | 2.211640000000  | 1.630129000000  | -3.026252000000 |
| C                                      | 1.700791000000  | 3.817202000000  | -3.567040000000 |
| H                                      | 1.811373000000  | 4.635737000000  | -4.272414000000 |
| C                                      | 0.952829000000  | 3.948479000000  | -2.385768000000 |
| H                                      | 0.452783000000  | 4.873245000000  | -2.124368000000 |
| C                                      | 4.271390000000  | 0.554694000000  | -4.768650000000 |
| H                                      | 3.762221000000  | 1.320995000000  | -5.355354000000 |
| H                                      | 5.130254000000  | 0.988966000000  | -4.251554000000 |
| C                                      | 0.881453000000  | 2.826386000000  | -1.544644000000 |
| H                                      | 0.328203000000  | 2.840999000000  | -0.613193000000 |
| C                                      | 4.653929000000  | -0.682169000000 | -5.587224000000 |
| H                                      | 5.372757000000  | -0.386564000000 | -6.363033000000 |
| H                                      | 3.779600000000  | -1.124622000000 | -6.078967000000 |
| H                                      | 5.132991000000  | -1.445401000000 | -4.963843000000 |
| I                                      | 4.782010000000  | 2.062866000000  | -0.081757000000 |
| I                                      | -0.829916000000 | -1.112773000000 | -1.893700000000 |
| I                                      | 0.829916000000  | 1.112773000000  | 1.893700000000  |
| Cu                                     | 3.254678000000  | 0.328034000000  | 1.223644000000  |
| Cu                                     | -1.217530000000 | 0.000683000000  | 0.570164000000  |
| Cu                                     | 6.358201000000  | 0.000825000000  | 0.570285000000  |
| I                                      | -4.782010000000 | -2.062866000000 | 0.081757000000  |
| Cu                                     | -3.254678000000 | -0.328034000000 | -1.223644000000 |
| Cu                                     | -6.358201000000 | -0.000825000000 | -0.570285000000 |
| S                                      | -4.701002000000 | -0.154619000000 | -3.437982000000 |
| N                                      | -6.703002000000 | 1.169041000000  | -2.157713000000 |
| N                                      | -6.026229000000 | 2.112167000000  | -4.262388000000 |
| C                                      | -5.922397000000 | 1.191783000000  | -3.283770000000 |
| C                                      | -6.972768000000 | 3.073135000000  | -4.131231000000 |
| H                                      | -7.032327000000 | 3.802768000000  | -4.933414000000 |
| C                                      | -7.828192000000 | 3.123751000000  | -3.016323000000 |
| H                                      | -8.581430000000 | 3.894638000000  | -2.908250000000 |
| C                                      | -3.630961000000 | 0.436578000000  | -4.913245000000 |
| H                                      | -4.304260000000 | 1.011663000000  | -5.550676000000 |
| H                                      | -2.867502000000 | 1.095085000000  | -4.491935000000 |
| C                                      | -7.651756000000 | 2.139961000000  | -2.033023000000 |
| H                                      | -8.240583000000 | 2.120245000000  | -1.121911000000 |
| C                                      | -3.024455000000 | -0.783507000000 | -5.613889000000 |
| H                                      | -2.400567000000 | -0.439670000000 | -6.449652000000 |
| H                                      | -3.802794000000 | -1.442870000000 | -6.014625000000 |
| H                                      | -2.385184000000 | -1.362957000000 | -4.938803000000 |
| I                                      | -2.793787000000 | 2.062865000000  | -0.081749000000 |
| I                                      | -6.745856000000 | 1.112760000000  | 1.893680000000  |
| Cu                                     | -4.321186000000 | 0.328140000000  | 1.223724000000  |

|   |                 |                 |                |
|---|-----------------|-----------------|----------------|
| S | 4.701002000000  | 0.154619000000  | 3.437982000000 |
| N | 6.703002000000  | -1.169041000000 | 2.157713000000 |
| N | 6.026229000000  | -2.112167000000 | 4.262388000000 |
| C | 5.922397000000  | -1.191783000000 | 3.283770000000 |
| C | 6.972768000000  | -3.073135000000 | 4.131231000000 |
| H | 7.032327000000  | -3.802768000000 | 4.933414000000 |
| C | 7.828192000000  | -3.123751000000 | 3.016323000000 |
| H | 8.581430000000  | -3.894638000000 | 2.908250000000 |
| C | 3.630961000000  | -0.436578000000 | 4.913245000000 |
| H | 4.304260000000  | -1.011663000000 | 5.550676000000 |
| H | 2.867502000000  | -1.095085000000 | 4.491935000000 |
| C | 7.651756000000  | -2.139961000000 | 2.033023000000 |
| H | 8.240583000000  | -2.120245000000 | 1.121911000000 |
| C | 3.024455000000  | 0.783507000000  | 5.613889000000 |
| H | 2.400567000000  | 0.439670000000  | 6.449652000000 |
| H | 3.802794000000  | 1.442870000000  | 6.014625000000 |
| H | 2.385184000000  | 1.362957000000  | 4.938803000000 |
| S | -3.027339000000 | -0.042648000000 | 3.406870000000 |
| N | -1.513510000000 | -1.663041000000 | 1.854901000000 |
| N | -2.324687000000 | -2.656615000000 | 3.890879000000 |
| C | -2.211640000000 | -1.630129000000 | 3.026252000000 |
| C | -1.700791000000 | -3.817202000000 | 3.567040000000 |
| H | -1.811373000000 | -4.635737000000 | 4.272414000000 |
| C | -0.952829000000 | -3.948479000000 | 2.385768000000 |
| H | -0.452783000000 | -4.873245000000 | 2.124368000000 |
| C | -4.271390000000 | -0.554694000000 | 4.768650000000 |
| H | -3.762221000000 | -1.320995000000 | 5.355354000000 |
| H | -5.130254000000 | -0.988966000000 | 4.251554000000 |
| C | -0.881453000000 | -2.826386000000 | 1.544644000000 |
| H | -0.328203000000 | -2.840999000000 | 0.613193000000 |
| C | -4.653929000000 | 0.682169000000  | 5.587224000000 |
| H | -5.372757000000 | 0.386564000000  | 6.363033000000 |
| H | -3.779600000000 | 1.124622000000  | 6.078967000000 |
| H | -5.132991000000 | 1.445401000000  | 4.963843000000 |

**Lowest triplet excited state ( $T_1$ )**

|    |                |                 |                 |
|----|----------------|-----------------|-----------------|
| I  | 3.360846000000 | -0.777386000000 | 1.724025000000  |
| Cu | 2.825409000000 | 1.171670000000  | -0.142291000000 |
| S  | 4.730224000000 | 2.017481000000  | -2.665773000000 |
| C  | 4.244500000000 | 3.427047000000  | 1.048110000000  |
| H  | 3.617410000000 | 3.134376000000  | 1.882413000000  |
| N  | 4.108477000000 | 2.686199000000  | -0.116378000000 |
| C  | 5.157881000000 | 4.482706000000  | 1.130769000000  |
| H  | 5.261997000000 | 5.052625000000  | 2.047738000000  |
| N  | 5.814228000000 | 4.035417000000  | -1.161595000000 |
| C  | 4.922637000000 | 3.039695000000  | -1.166235000000 |
| C  | 5.939086000000 | 4.773781000000  | -0.005087000000 |
| H  | 6.669886000000 | 5.575094000000  | -0.022225000000 |
| C  | 6.018990000000 | 2.065357000000  | -5.156071000000 |
| H  | 5.040786000000 | 2.147728000000  | -5.645104000000 |
| H  | 6.260949000000 | 1.001232000000  | -5.044103000000 |
| H  | 6.768233000000 | 2.512528000000  | -5.822444000000 |
| C  | 6.039641000000 | 2.795809000000  | -3.807688000000 |
| H  | 5.789880000000 | 3.854480000000  | -3.901491000000 |

|    |                 |                 |                 |
|----|-----------------|-----------------|-----------------|
| H  | 7.002165000000  | 2.709665000000  | -3.298840000000 |
| I  | 0.768590000000  | 0.777198000000  | -1.724116000000 |
| Cu | 1.303755000000  | -1.171738000000 | 0.142445000000  |
| I  | -0.768590000000 | -0.777198000000 | 1.724116000000  |
| Cu | -1.303755000000 | 1.171738000000  | -0.142445000000 |
| S  | 0.090415000000  | 4.261403000000  | 0.194199000000  |
| C  | -3.048691000000 | 2.448864000000  | 1.858007000000  |
| H  | -3.483387000000 | 1.459536000000  | 1.766570000000  |
| N  | -1.935107000000 | 2.699829000000  | 1.103844000000  |
| C  | -3.604477000000 | 3.422202000000  | 2.696621000000  |
| H  | -4.488365000000 | 3.211554000000  | 3.286685000000  |
| N  | -1.861298000000 | 4.938988000000  | 1.989645000000  |
| C  | -1.383651000000 | 3.951000000000  | 1.204739000000  |
| C  | -2.969363000000 | 4.677641000000  | 2.733740000000  |
| H  | -3.334109000000 | 5.489799000000  | 3.355321000000  |
| C  | 1.599754000000  | 6.573179000000  | -0.268940000000 |
| H  | 1.377982000000  | 6.483812000000  | -1.339097000000 |
| H  | 2.514573000000  | 6.006993000000  | -0.057586000000 |
| H  | 1.799891000000  | 7.630697000000  | -0.052156000000 |
| C  | 0.423557000000  | 6.095450000000  | 0.591851000000  |
| H  | -0.498835000000 | 6.639769000000  | 0.379451000000  |
| H  | 0.631006000000  | 6.164294000000  | 1.661928000000  |
| I  | -3.360846000000 | 0.777386000000  | -1.724025000000 |
| Cu | -2.825409000000 | -1.171670000000 | 0.142291000000  |
| S  | -4.730224000000 | -2.017481000000 | 2.665773000000  |
| C  | -4.244500000000 | -3.427047000000 | -1.048110000000 |
| H  | -3.617410000000 | -3.134376000000 | -1.882413000000 |
| N  | -4.108477000000 | -2.686199000000 | 0.116378000000  |
| C  | -5.157881000000 | -4.482706000000 | -1.130769000000 |
| H  | -5.261997000000 | -5.052625000000 | -2.047738000000 |
| N  | -5.814228000000 | -4.035417000000 | 1.161595000000  |
| C  | -4.922637000000 | -3.039695000000 | 1.166235000000  |
| C  | -5.939086000000 | -4.773781000000 | 0.005087000000  |
| H  | -6.669886000000 | -5.575094000000 | 0.022225000000  |
| C  | -6.018990000000 | -2.065357000000 | 5.156071000000  |
| H  | -5.040786000000 | -2.147728000000 | 5.645104000000  |
| H  | -6.260949000000 | -1.001232000000 | 5.044103000000  |
| H  | -6.768233000000 | -2.512528000000 | 5.822444000000  |
| C  | -6.039641000000 | -2.795809000000 | 3.807688000000  |
| H  | -5.789880000000 | -3.854480000000 | 3.901491000000  |
| H  | -7.002165000000 | -2.709665000000 | 3.298840000000  |
| S  | -0.090415000000 | -4.261403000000 | -0.194199000000 |
| C  | 3.048691000000  | -2.448864000000 | -1.858007000000 |
| H  | 3.483387000000  | -1.459536000000 | -1.766570000000 |
| N  | 1.935107000000  | -2.699829000000 | -1.103844000000 |
| C  | 3.604477000000  | -3.422202000000 | -2.696621000000 |
| H  | 4.488365000000  | -3.211554000000 | -3.286685000000 |
| N  | 1.861298000000  | -4.938988000000 | -1.989645000000 |
| C  | 1.383651000000  | -3.951000000000 | -1.204739000000 |
| C  | 2.969363000000  | -4.677641000000 | -2.733740000000 |
| H  | 3.334109000000  | -5.489799000000 | -3.355321000000 |
| C  | -1.599754000000 | -6.573179000000 | 0.268940000000  |
| H  | -1.377982000000 | -6.483812000000 | 1.339097000000  |
| H  | -2.514573000000 | -6.006993000000 | 0.057586000000  |

|   |                 |                 |                 |
|---|-----------------|-----------------|-----------------|
| H | -1.799891000000 | -7.630697000000 | 0.052156000000  |
| C | -0.423557000000 | -6.095450000000 | -0.591851000000 |
| H | 0.498835000000  | -6.639769000000 | -0.379451000000 |
| H | -0.631006000000 | -6.164294000000 | -1.661928000000 |

**Table S5.** Gas phase geometries of the model  $\{\text{Cu}_4\text{I}_4(\text{L}^2)_4\}$  (the complex  $[\text{CuL}^2\text{I}]_n$ ) in Cartesian (XYZ) coordinates as calculated in Gaussian software at the B3LYP/LANL2DZ/D95V level of theory.

| <b>Ground state (<math>S_0</math>)</b> |                 |                 |                 |
|----------------------------------------|-----------------|-----------------|-----------------|
| I                                      | 3.360744000000  | -0.777345000000 | 1.724092000000  |
| Cu                                     | 2.825564000000  | 1.171609000000  | -0.142422000000 |
| S                                      | 4.344133000000  | 3.133966000000  | -2.390379000000 |
| C                                      | 4.202561000000  | 3.062339000000  | 1.584646000000  |
| H                                      | 3.745873000000  | 2.384432000000  | 2.298982000000  |
| N                                      | 4.005673000000  | 2.766456000000  | 0.269930000000  |
| C                                      | 4.973966000000  | 4.164868000000  | 1.982143000000  |
| H                                      | 5.125972000000  | 4.393620000000  | 3.030086000000  |
| N                                      | 5.370102000000  | 4.652745000000  | -0.349906000000 |
| C                                      | 4.607074000000  | 3.578133000000  | -0.656742000000 |
| C                                      | 5.546511000000  | 4.944248000000  | 0.961624000000  |
| H                                      | 6.160949000000  | 5.812807000000  | 1.181571000000  |
| C                                      | 5.255923000000  | 4.264527000000  | -4.782086000000 |
| H                                      | 4.215970000000  | 4.344543000000  | -5.120521000000 |
| H                                      | 5.642410000000  | 3.283980000000  | -5.085206000000 |
| H                                      | 5.841214000000  | 5.033438000000  | -5.302935000000 |
| C                                      | 5.374869000000  | 4.476520000000  | -3.267504000000 |
| H                                      | 4.982120000000  | 5.444317000000  | -2.949038000000 |
| H                                      | 6.403195000000  | 4.381439000000  | -2.911989000000 |
| I                                      | 0.768562000000  | 0.777354000000  | -1.724098000000 |
| Cu                                     | 1.303732000000  | -1.171599000000 | 0.142427000000  |
| I                                      | -0.768562000000 | -0.777354000000 | 1.724098000000  |
| Cu                                     | -1.303732000000 | 1.171599000000  | -0.142427000000 |
| S                                      | -1.141343000000 | 4.362563000000  | -1.312660000000 |
| C                                      | -1.852546000000 | 2.819000000000  | 2.286059000000  |
| H                                      | -1.828480000000 | 1.811917000000  | 2.688866000000  |
| N                                      | -1.545036000000 | 2.940188000000  | 0.966129000000  |
| C                                      | -2.175470000000 | 3.929011000000  | 3.082215000000  |
| H                                      | -2.422490000000 | 3.813297000000  | 4.130828000000  |
| N                                      | -1.849943000000 | 5.328465000000  | 1.145314000000  |
| C                                      | -1.554662000000 | 4.208062000000  | 0.440676000000  |
| C                                      | -2.161108000000 | 5.186218000000  | 2.455243000000  |
| H                                      | -2.398739000000 | 6.099200000000  | 2.994594000000  |
| C                                      | -1.080187000000 | 6.560968000000  | -3.037052000000 |
| H                                      | -1.799381000000 | 6.047604000000  | -3.686460000000 |
| H                                      | -0.069129000000 | 6.270117000000  | -3.347559000000 |
| H                                      | -1.187003000000 | 7.641498000000  | -3.200293000000 |
| C                                      | -1.332529000000 | 6.241416000000  | -1.557712000000 |
| H                                      | -2.342928000000 | 6.509493000000  | -1.241747000000 |
| H                                      | -0.617628000000 | 6.735654000000  | -0.895989000000 |
| I                                      | -3.360744000000 | 0.777345000000  | -1.724092000000 |
| Cu                                     | -2.825564000000 | -1.171609000000 | 0.142422000000  |
| S                                      | -4.344133000000 | -3.133966000000 | 2.390379000000  |
| C                                      | -4.202561000000 | -3.062339000000 | -1.584646000000 |



|   |                 |                 |                 |
|---|-----------------|-----------------|-----------------|
| H | -3.745873000000 | -2.384432000000 | -2.298982000000 |
| N | -4.005673000000 | -2.766456000000 | -0.269930000000 |
| C | -4.973966000000 | -4.164868000000 | -1.982143000000 |
| H | -5.125972000000 | -4.393620000000 | -3.030086000000 |
| N | -5.370102000000 | -4.652745000000 | 0.349906000000  |
| C | -4.607074000000 | -3.578133000000 | 0.656742000000  |
| C | -5.546511000000 | -4.944248000000 | -0.961624000000 |
| H | -6.160949000000 | -5.812807000000 | -1.181571000000 |
| C | -5.255923000000 | -4.264527000000 | 4.782086000000  |
| H | -4.215970000000 | -4.344543000000 | 5.120521000000  |
| H | -5.642410000000 | -3.283980000000 | 5.085206000000  |
| H | -5.841214000000 | -5.033438000000 | 5.302935000000  |
| C | -5.374869000000 | -4.476520000000 | 3.267504000000  |
| H | -4.982120000000 | -5.444317000000 | 2.949038000000  |
| H | -6.403195000000 | -4.381439000000 | 2.911989000000  |
| S | 1.141343000000  | -4.362563000000 | 1.312660000000  |
| C | 1.852546000000  | -2.819000000000 | -2.286059000000 |
| H | 1.828480000000  | -1.811917000000 | -2.688866000000 |
| N | 1.545036000000  | -2.940188000000 | -0.966129000000 |
| C | 2.175470000000  | -3.929011000000 | -3.082215000000 |
| H | 2.422490000000  | -3.813297000000 | -4.130828000000 |
| N | 1.849943000000  | -5.328465000000 | -1.145314000000 |
| C | 1.554662000000  | -4.208062000000 | -0.440676000000 |
| C | 2.161108000000  | -5.186218000000 | -2.455243000000 |
| H | 2.398739000000  | -6.099200000000 | -2.994594000000 |
| C | 1.080187000000  | -6.560968000000 | 3.037052000000  |
| H | 1.799381000000  | -6.047604000000 | 3.686460000000  |
| H | 0.069129000000  | -6.270117000000 | 3.347559000000  |
| H | 1.187003000000  | -7.641498000000 | 3.200293000000  |
| C | 1.332529000000  | -6.241416000000 | 1.557712000000  |
| H | 2.342928000000  | -6.509493000000 | 1.241747000000  |
| H | 0.617628000000  | -6.735654000000 | 0.895989000000  |

**Lowest triplet excited state ( $T_1$ )**

|    |                |                 |                 |
|----|----------------|-----------------|-----------------|
| I  | 3.360846000000 | -0.777386000000 | 1.724025000000  |
| Cu | 2.825409000000 | 1.171670000000  | -0.142291000000 |
| S  | 4.730224000000 | 2.017481000000  | -2.665773000000 |
| C  | 4.244500000000 | 3.427047000000  | 1.048110000000  |
| H  | 3.617410000000 | 3.134376000000  | 1.882413000000  |
| N  | 4.108477000000 | 2.686199000000  | -0.116378000000 |
| C  | 5.157881000000 | 4.482706000000  | 1.130769000000  |
| H  | 5.261997000000 | 5.052625000000  | 2.047738000000  |
| N  | 5.814228000000 | 4.035417000000  | -1.161595000000 |
| C  | 4.922637000000 | 3.039695000000  | -1.166235000000 |
| C  | 5.939086000000 | 4.773781000000  | -0.005087000000 |
| H  | 6.669886000000 | 5.575094000000  | -0.022225000000 |
| C  | 6.018990000000 | 2.065357000000  | -5.156071000000 |
| H  | 5.040786000000 | 2.147728000000  | -5.645104000000 |
| H  | 6.260949000000 | 1.001232000000  | -5.044103000000 |
| H  | 6.768233000000 | 2.512528000000  | -5.822444000000 |
| C  | 6.039641000000 | 2.795809000000  | -3.807688000000 |
| H  | 5.789880000000 | 3.854480000000  | -3.901491000000 |
| H  | 7.002165000000 | 2.709665000000  | -3.298840000000 |
| I  | 0.768590000000 | 0.777198000000  | -1.724116000000 |

|    |                 |                 |                 |
|----|-----------------|-----------------|-----------------|
| Cu | 1.303755000000  | -1.171738000000 | 0.142445000000  |
| I  | -0.768590000000 | -0.777198000000 | 1.724116000000  |
| Cu | -1.303755000000 | 1.171738000000  | -0.142445000000 |
| S  | 0.090415000000  | 4.261403000000  | 0.194199000000  |
| C  | -3.048691000000 | 2.448864000000  | 1.858007000000  |
| H  | -3.483387000000 | 1.459536000000  | 1.766570000000  |
| N  | -1.935107000000 | 2.699829000000  | 1.103844000000  |
| C  | -3.604477000000 | 3.422202000000  | 2.696621000000  |
| H  | -4.488365000000 | 3.211554000000  | 3.286685000000  |
| N  | -1.861298000000 | 4.938988000000  | 1.989645000000  |
| C  | -1.383651000000 | 3.951000000000  | 1.204739000000  |
| C  | -2.969363000000 | 4.677641000000  | 2.733740000000  |
| H  | -3.334109000000 | 5.489799000000  | 3.355321000000  |
| C  | 1.599754000000  | 6.573179000000  | -0.268940000000 |
| H  | 1.377982000000  | 6.483812000000  | -1.339097000000 |
| H  | 2.514573000000  | 6.006993000000  | -0.057586000000 |
| H  | 1.799891000000  | 7.630697000000  | -0.052156000000 |
| C  | 0.423557000000  | 6.095450000000  | 0.591851000000  |
| H  | -0.498835000000 | 6.639769000000  | 0.379451000000  |
| H  | 0.631006000000  | 6.164294000000  | 1.661928000000  |
| I  | -3.360846000000 | 0.777386000000  | -1.724025000000 |
| Cu | -2.825409000000 | -1.171670000000 | 0.142291000000  |
| S  | -4.730224000000 | -2.017481000000 | 2.665773000000  |
| C  | -4.244500000000 | -3.427047000000 | -1.048110000000 |
| H  | -3.617410000000 | -3.134376000000 | -1.882413000000 |
| N  | -4.108477000000 | -2.686199000000 | 0.116378000000  |
| C  | -5.157881000000 | -4.482706000000 | -1.130769000000 |
| H  | -5.261997000000 | -5.052625000000 | -2.047738000000 |
| N  | -5.814228000000 | -4.035417000000 | 1.161595000000  |
| C  | -4.922637000000 | -3.039695000000 | 1.166235000000  |
| C  | -5.939086000000 | -4.773781000000 | 0.005087000000  |
| H  | -6.669886000000 | -5.575094000000 | 0.022225000000  |
| C  | -6.018990000000 | -2.065357000000 | 5.156071000000  |
| H  | -5.040786000000 | -2.147728000000 | 5.645104000000  |
| H  | -6.260949000000 | -1.001232000000 | 5.044103000000  |
| H  | -6.768233000000 | -2.512528000000 | 5.822444000000  |
| C  | -6.039641000000 | -2.795809000000 | 3.807688000000  |
| H  | -5.789880000000 | -3.854480000000 | 3.901491000000  |
| H  | -7.002165000000 | -2.709665000000 | 3.298840000000  |
| S  | -0.090415000000 | -4.261403000000 | -0.194199000000 |
| C  | 3.048691000000  | -2.448864000000 | -1.858007000000 |
| H  | 3.483387000000  | -1.459536000000 | -1.766570000000 |
| N  | 1.935107000000  | -2.699829000000 | -1.103844000000 |
| C  | 3.604477000000  | -3.422202000000 | -2.696621000000 |
| H  | 4.488365000000  | -3.211554000000 | -3.286685000000 |
| N  | 1.861298000000  | -4.938988000000 | -1.989645000000 |
| C  | 1.383651000000  | -3.951000000000 | -1.204739000000 |
| C  | 2.969363000000  | -4.677641000000 | -2.733740000000 |
| H  | 3.334109000000  | -5.489799000000 | -3.355321000000 |
| C  | -1.599754000000 | -6.573179000000 | 0.268940000000  |
| H  | -1.377982000000 | -6.483812000000 | 1.339097000000  |
| H  | -2.514573000000 | -6.006993000000 | 0.057586000000  |
| H  | -1.799891000000 | -7.630697000000 | 0.052156000000  |
| C  | -0.423557000000 | -6.095450000000 | -0.591851000000 |

|                                                     |                 |                 |                 |
|-----------------------------------------------------|-----------------|-----------------|-----------------|
| H                                                   | 0.498835000000  | -6.639769000000 | -0.379451000000 |
| H                                                   | -0.631006000000 | -6.164294000000 | -1.661928000000 |
| <b>Lowest singlet excited state (S<sub>1</sub>)</b> |                 |                 |                 |
| I                                                   | 3.360744000000  | -0.777345000000 | 1.724092000000  |
| Cu                                                  | 2.825564000000  | 1.171609000000  | -0.142422000000 |
| S                                                   | 4.200760000000  | 2.802664000000  | -2.705976000000 |
| C                                                   | 4.312989000000  | 3.241639000000  | 1.280892000000  |
| H                                                   | 3.887087000000  | 2.687781000000  | 2.108621000000  |
| N                                                   | 4.007739000000  | 2.777088000000  | 0.002241000000  |
| C                                                   | 5.140955000000  | 4.350066000000  | 1.469256000000  |
| H                                                   | 5.374296000000  | 4.699447000000  | 2.469474000000  |
| N                                                   | 5.374283000000  | 4.529795000000  | -0.940568000000 |
| C                                                   | 4.579170000000  | 3.462782000000  | -1.042953000000 |
| C                                                   | 5.664253000000  | 4.993372000000  | 0.329875000000  |
| H                                                   | 6.311894000000  | 5.860699000000  | 0.390576000000  |
| C                                                   | 5.091419000000  | 3.527598000000  | -5.262621000000 |
| H                                                   | 4.046822000000  | 3.612916000000  | -5.586469000000 |
| H                                                   | 5.421050000000  | 2.495006000000  | -5.431375000000 |
| H                                                   | 5.697738000000  | 4.184045000000  | -5.900731000000 |
| C                                                   | 5.263422000000  | 3.942259000000  | -3.795725000000 |
| H                                                   | 4.932763000000  | 4.965765000000  | -3.608367000000 |
| H                                                   | 6.295626000000  | 3.845358000000  | -3.452301000000 |
| I                                                   | 0.768562000000  | 0.777354000000  | -1.724098000000 |
| Cu                                                  | 1.303732000000  | -1.171599000000 | 0.142427000000  |
| I                                                   | -0.768562000000 | -0.777354000000 | 1.724098000000  |
| Cu                                                  | -1.303732000000 | 1.171599000000  | -0.142427000000 |
| S                                                   | -1.046583000000 | 4.350584000000  | -1.242216000000 |
| C                                                   | -2.064447000000 | 2.780282000000  | 2.271107000000  |
| H                                                   | -2.108489000000 | 1.769069000000  | 2.659975000000  |
| N                                                   | -1.654656000000 | 2.913364000000  | 0.981337000000  |
| C                                                   | -2.403838000000 | 3.888331000000  | 3.061144000000  |
| H                                                   | -2.729778000000 | 3.767196000000  | 4.086896000000  |
| N                                                   | -1.891002000000 | 5.303785000000  | 1.175989000000  |
| C                                                   | -1.584508000000 | 4.186211000000  | 0.472640000000  |
| C                                                   | -2.297240000000 | 5.153307000000  | 2.457524000000  |
| H                                                   | -2.536668000000 | 6.066244000000  | 2.995623000000  |
| C                                                   | -0.592928000000 | 6.571429000000  | -2.875467000000 |
| H                                                   | -1.247472000000 | 6.127944000000  | -3.635354000000 |
| H                                                   | 0.429469000000  | 6.215197000000  | -3.048842000000 |
| H                                                   | -0.600502000000 | 7.659938000000  | -3.016712000000 |
| C                                                   | -1.071410000000 | 6.243981000000  | -1.455442000000 |
| H                                                   | -2.094619000000 | 6.577346000000  | -1.270528000000 |
| H                                                   | -0.419187000000 | 6.665021000000  | -0.687603000000 |
| I                                                   | -3.360744000000 | 0.777345000000  | -1.724092000000 |
| Cu                                                  | -2.825564000000 | -1.171609000000 | 0.142422000000  |
| S                                                   | -4.200760000000 | -2.802664000000 | 2.705976000000  |
| C                                                   | -4.312989000000 | -3.241639000000 | -1.280892000000 |
| H                                                   | -3.887087000000 | -2.687781000000 | -2.108621000000 |
| N                                                   | -4.007739000000 | -2.777088000000 | -0.002241000000 |
| C                                                   | -5.140955000000 | -4.350066000000 | -1.469256000000 |
| H                                                   | -5.374296000000 | -4.699447000000 | -2.469474000000 |
| N                                                   | -5.374283000000 | -4.529795000000 | 0.940568000000  |
| C                                                   | -4.579170000000 | -3.462782000000 | 1.042953000000  |
| C                                                   | -5.664253000000 | -4.993372000000 | -0.329875000000 |

|   |                 |                 |                 |
|---|-----------------|-----------------|-----------------|
| H | -6.311894000000 | -5.860699000000 | -0.390576000000 |
| C | -5.091419000000 | -3.527598000000 | 5.262621000000  |
| H | -4.046822000000 | -3.612916000000 | 5.586469000000  |
| H | -5.421050000000 | -2.495006000000 | 5.431375000000  |
| H | -5.697738000000 | -4.184045000000 | 5.900731000000  |
| C | -5.263422000000 | -3.942259000000 | 3.795725000000  |
| H | -4.932763000000 | -4.965765000000 | 3.608367000000  |
| H | -6.295626000000 | -3.845358000000 | 3.452301000000  |
| S | 1.046583000000  | -4.350584000000 | 1.242216000000  |
| C | 2.064447000000  | -2.780282000000 | -2.271107000000 |
| H | 2.108489000000  | -1.769069000000 | -2.659975000000 |
| N | 1.654656000000  | -2.913364000000 | -0.981337000000 |
| C | 2.403838000000  | -3.888331000000 | -3.061144000000 |
| H | 2.729778000000  | -3.767196000000 | -4.086896000000 |
| N | 1.891002000000  | -5.303785000000 | -1.175989000000 |
| C | 1.584508000000  | -4.186211000000 | -0.472640000000 |
| C | 2.297240000000  | -5.153307000000 | -2.457524000000 |
| H | 2.536668000000  | -6.066244000000 | -2.995623000000 |
| C | 0.592928000000  | -6.571429000000 | 2.875467000000  |
| H | 1.247472000000  | -6.127944000000 | 3.635354000000  |
| H | -0.429469000000 | -6.215197000000 | 3.048842000000  |
| H | 0.600502000000  | -7.659938000000 | 3.016712000000  |
| C | 1.071410000000  | -6.243981000000 | 1.455442000000  |
| H | 2.094619000000  | -6.577346000000 | 1.270528000000  |
| H | 0.419187000000  | -6.665021000000 | 0.687603000000  |

Table S6. X-ray crystal structure and gas phase optimized geometries of the complex  $[\text{Cu}_2\text{L}^1\text{I}_2]_n$ . Hydrogen atoms are omitted for clarity. Plane  $\alpha$  is marked purple; plane  $\beta$  is marked orange.

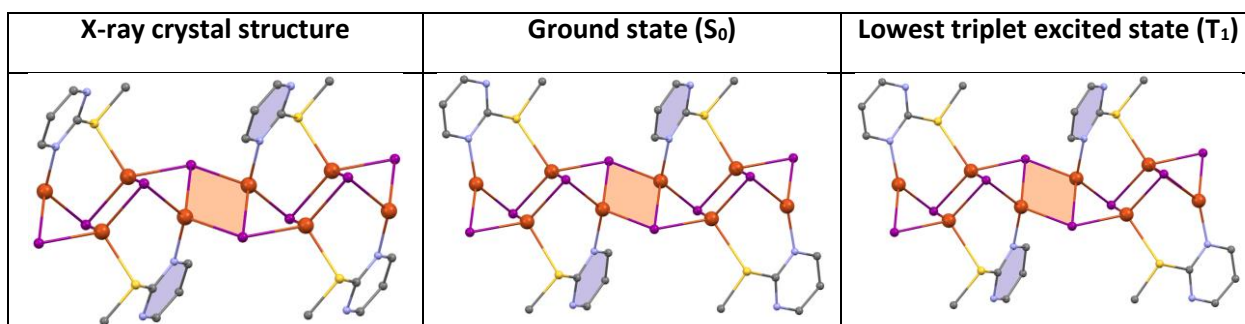

Table S7. X-ray crystal structure and gas phase optimized geometries of the complex  $[\text{Cu}_2\text{L}^2\text{I}_2]_n$ . Hydrogen atoms are omitted for clarity. Plane  $\alpha$  is marked purple; plane  $\beta$  is marked orange.

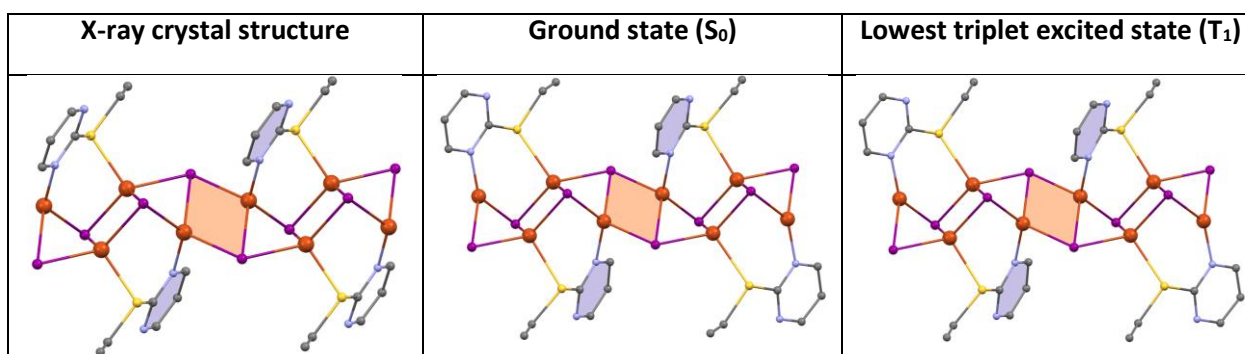

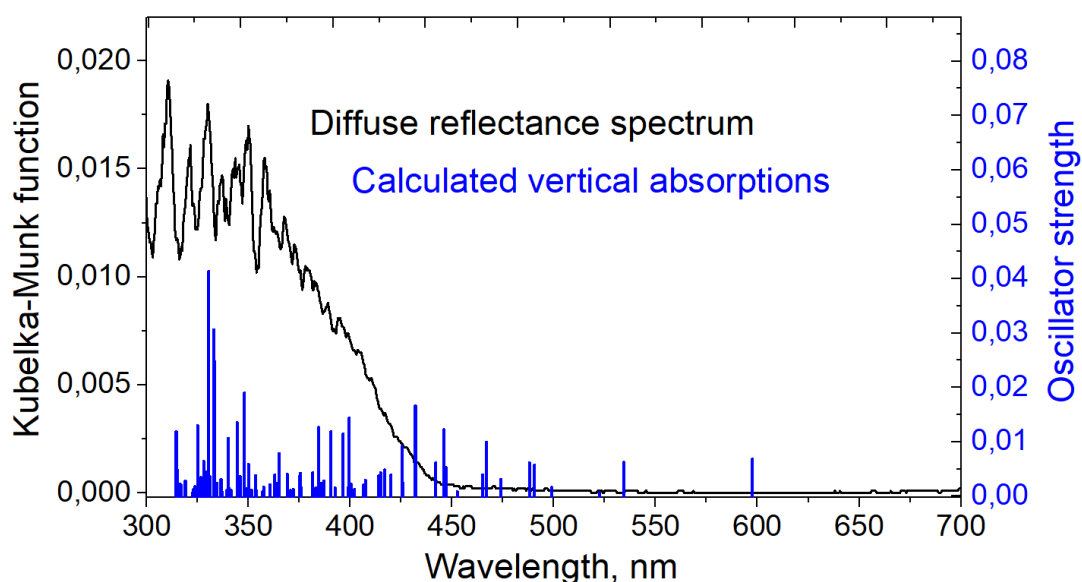

Figure S6. Diffuse reflectance spectrum of the complex  $[\text{Cu}_2\text{L}^1\text{I}_2]_n$  in the solid state (black). Vertical bars (blue) display the positions and oscillator strengths of the electronic transitions as calculated in Gaussian.

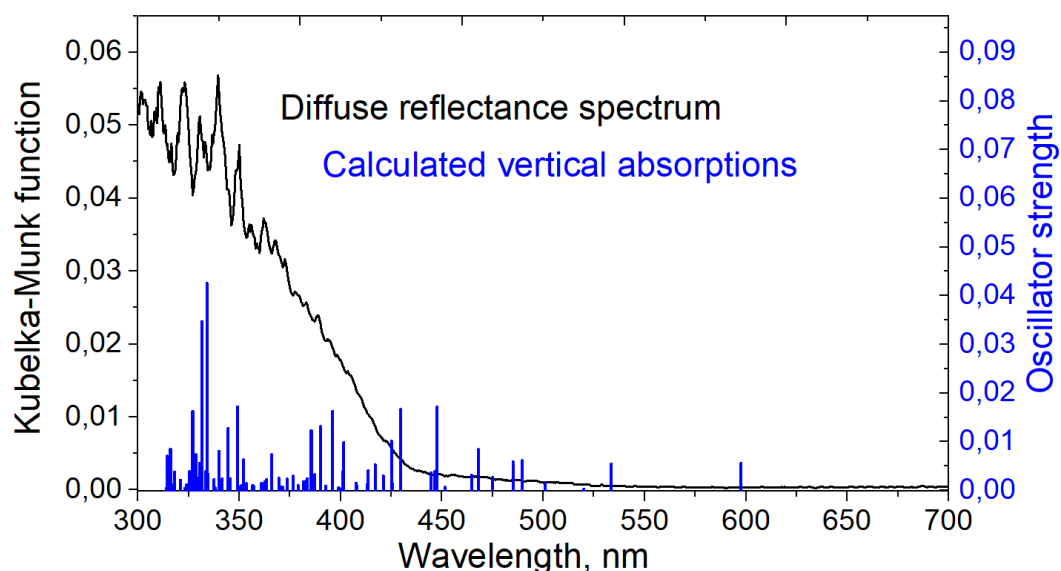

Figure S7. Diffuse reflectance spectrum of the complex  $[\text{Cu}_2\text{L}^2\text{I}_2]_n$  in the solid state (black). Vertical bars (blue) display the positions and oscillator strengths of the electronic transitions as calculated in Gaussian.

Table S8. Excited state properties of the model  $\{\text{Cu}_8\text{I}_8(\text{L}^1)_4\}$  (the complex  $[\text{Cu}_2\text{L}^1\text{I}_2]_n$ ) obtained from TD-DFT calculations in Gaussian software at the relaxed geometry of the ground state ( $S_0$ ). Transitions with contribution  $>10\%$  are shown.

| State | Energy (eV) | Energy (nm) | Contributions (%)                                                                                                  | Oscillator strength | Character |
|-------|-------------|-------------|--------------------------------------------------------------------------------------------------------------------|---------------------|-----------|
| S1    | 2.0745      | 598         | HOMO $\rightarrow$ LUMO+1 (67.9 %),<br>HOMO-1 $\rightarrow$ LUMO (28.6 %)                                          | 0.0063              |           |
| S2    | 2.3194      | 535         | HOMO-1 $\rightarrow$ LUMO (39.8 %),<br>HOMO $\rightarrow$ LUMO+1 (25.6 %),<br>HOMO-2 $\rightarrow$ LUMO+1 (21.0 %) | 0.0057              |           |
| S3    | 2.3735      | 522         | HOMO-3 $\rightarrow$ LUMO (35.7 %),<br>HOMO-4 $\rightarrow$ LUMO+1 (21.3 %),                                       | 0.0001              |           |

|     |        |     |                                                                                                                                         |        |       |       |
|-----|--------|-----|-----------------------------------------------------------------------------------------------------------------------------------------|--------|-------|-------|
|     |        |     | HOMO-1 → LUMO (18.5 %),<br>HOMO-2 → LUMO+1 (10.7 %)                                                                                     |        | XMLCT |       |
| S4  | 2.4836 | 499 | HOMO-5 → LUMO (36.1 %),<br>HOMO-7 → LUMO+1 (25.7 %)                                                                                     | 0.0011 |       |       |
| S5  | 2.5281 | 490 | HOMO-2 → LUMO+1 (45.0 %),<br>HOMO-4 → LUMO+1 (24.1 %),<br>HOMO-10 → LUMO (10.2 %)                                                       | 0.0051 |       |       |
| S6  | 2.5537 | 486 | HOMO → LUMO+5 (56.2 %),<br>HOMO → LUMO+3 (26.0 %)                                                                                       | 0.0056 |       |       |
| S7  | 2.6148 | 474 | HOMO-6 → LUMO+1 (30.9 %),<br>HOMO-3 → LUMO (14.3 %),<br>HOMO-10 → LUMO (13.5 %),<br>HOMO-2 → LUMO+1 (12.6 %),<br>HOMO-5 → LUMO (11.5 %) | 0.0025 |       |       |
| S8  | 2.6538 | 467 | HOMO-6 → LUMO+1 (25.6 %),<br>HOMO-8 → LUMO (25.1 %),<br>HOMO-9 → LUMO+1 (15.9 %)                                                        | 0.0095 |       |       |
| S9  | 2.6659 | 465 | HOMO → LUMO+3 (43.1 %),<br>HOMO → LUMO+5 (22.5 %),<br>HOMO-1 → LUMO+4 (15.3 %),<br>HOMO-2 → LUMO+2 (11.1 %)                             | 0.0034 |       |       |
| S10 | 2.7406 | 452 | HOMO-4 → LUMO (37.1 %),<br>HOMO-3 → LUMO+1 (23.8 %),<br>HOMO-5 → LUMO+1 (17.0 %)                                                        | 0.0003 |       |       |
| T1  | 2.0425 | 607 | HOMO → LUMO+1 (62.2 %),<br>HOMO-1 → LUMO (30.5 %)                                                                                       | 0.0000 |       | XMLCT |
| T2  | 2.3077 | 537 | HOMO-1 → LUMO (34.5 %),<br>HOMO → LUMO+1 (29.7 %),<br>HOMO-2 → LUMO+1 (22.2 %)                                                          | 0.0000 |       |       |
| T3  | 2.3606 | 525 | HOMO-3 → LUMO (31.8 %),<br>HOMO-4 → LUMO+1 (23.5 %),<br>HOMO-1 → LUMO (12.6 %)                                                          | 0.0000 |       |       |
| T4  | 2.4432 | 507 | HOMO-7 → LUMO+1 (24.9 %),<br>HOMO-5 → LUMO (23.3 %),<br>HOMO-10 → LUMO (12.5 %),<br>HOMO-1 → LUMO (11.6 %)                              | 0.0000 |       |       |
| T5  | 2.4860 | 499 | HOMO → LUMO+2 (55.4 %),<br>HOMO → LUMO+4 (20.0 %)                                                                                       | 0.0000 |       |       |
| T6  | 2.5002 | 496 | HOMO → LUMO+5 (39.1 %),<br>HOMO → LUMO+3 (18.2 %)                                                                                       | 0.0000 |       |       |
| T7  | 2.5038 | 495 | HOMO-2 → LUMO+1 (32.7 %),<br>HOMO-4 → LUMO+1 (21.4 %)                                                                                   | 0.0000 |       |       |
| T8  | 2.5939 | 478 | HOMO-6 → LUMO+1 (30.0 %),<br>HOMO-2 → LUMO+1 (12.4 %)                                                                                   | 0.0000 |       |       |
| T9  | 2.6305 | 471 | HOMO-8 → LUMO (26.7 %),<br>HOMO-9 → LUMO+1 (20.4 %),<br>HOMO-3 → LUMO (13.5 %),<br>HOMO-5 → LUMO (12.7 %)                               | 0.0000 |       |       |
| T10 | 2.6534 | 467 | HOMO → LUMO+3 (45.6 %),<br>HOMO → LUMO+5 (22.8 %),<br>HOMO-1 → LUMO+4 (16.4 %),<br>HOMO-1 → LUMO+2 (10.9 %)                             | 0.0000 |       |       |

Table S9. Iso-surface contour plots (iso-value = 0.02) of the model  $\{\text{Cu}_8\text{L}_8(\text{L}^1)_4\}$  (the complex  $[\text{Cu}_2\text{L}^1\text{L}_2]_n$ ) as calculated in Gaussian software at the ground state ( $S_0$ ) geometry.

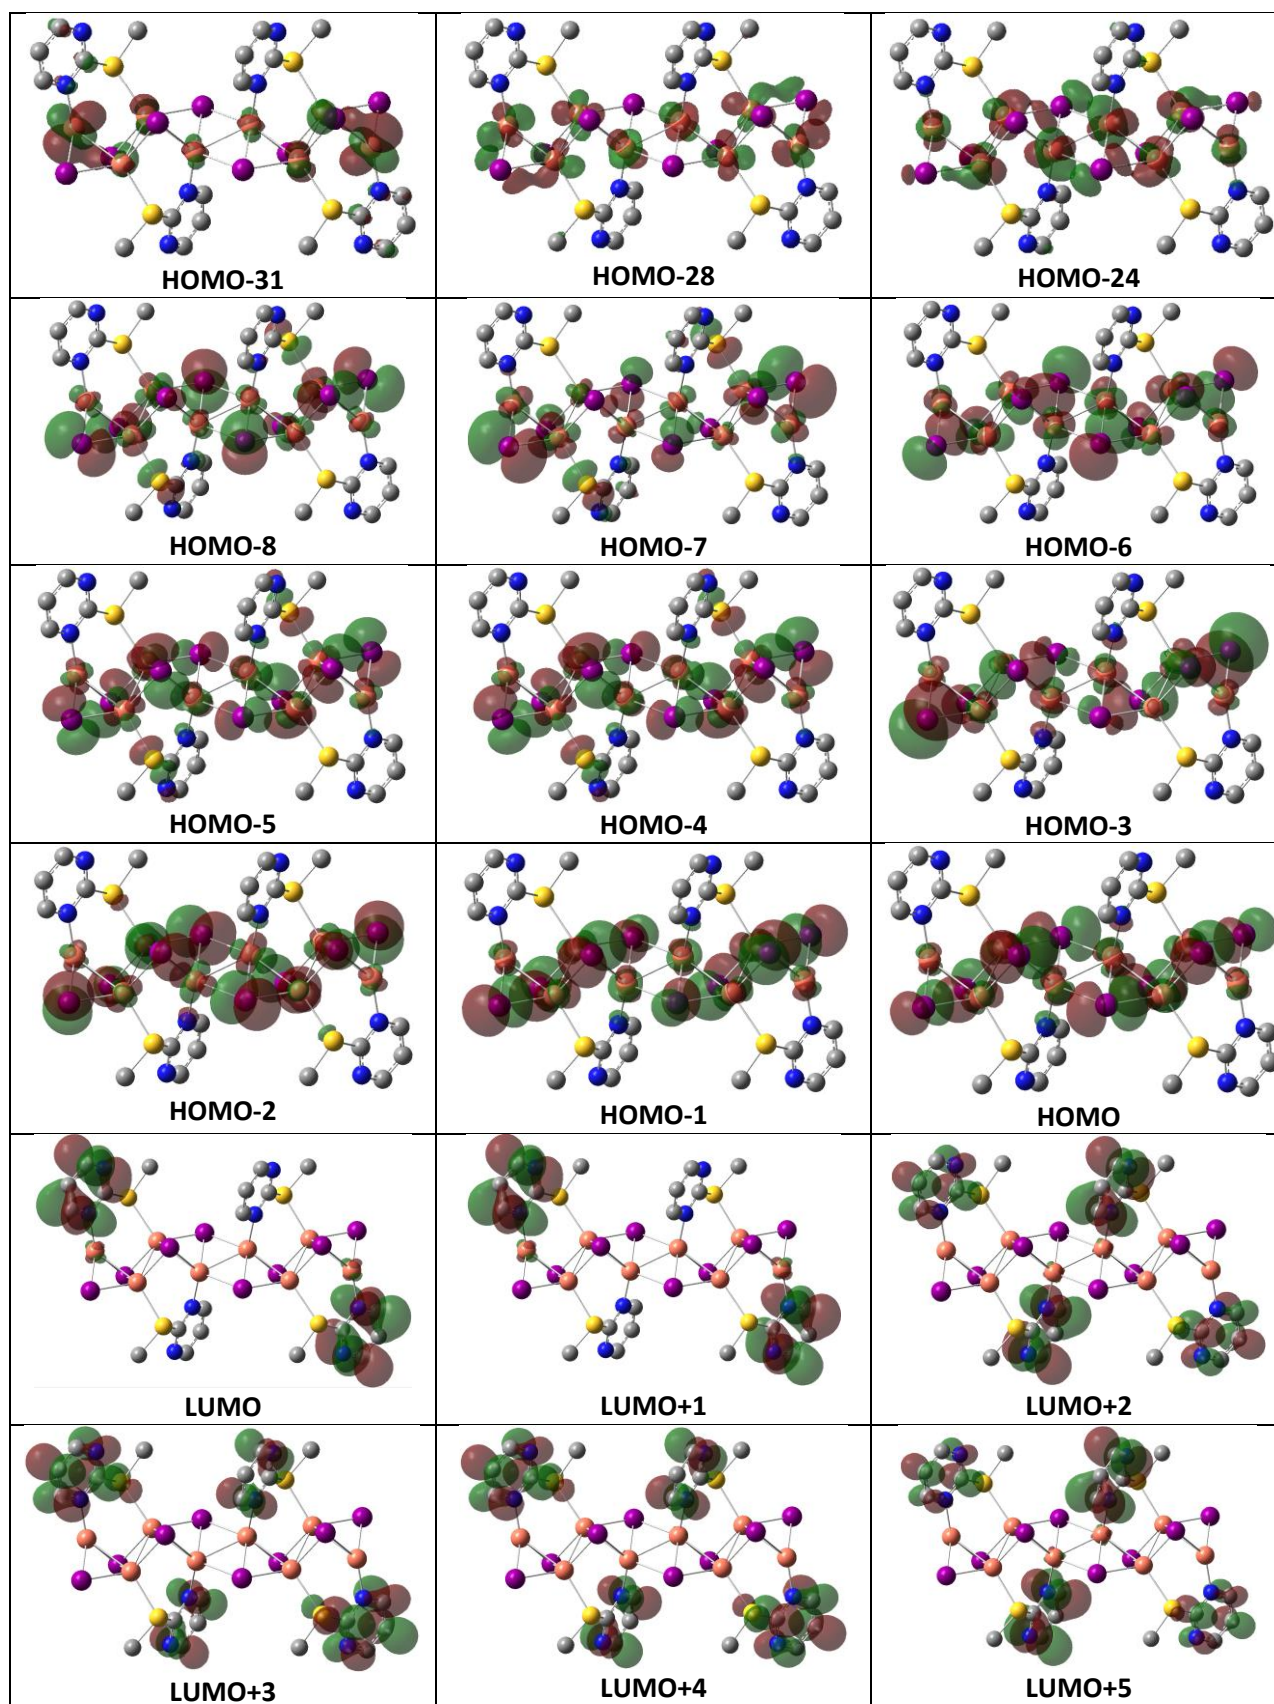

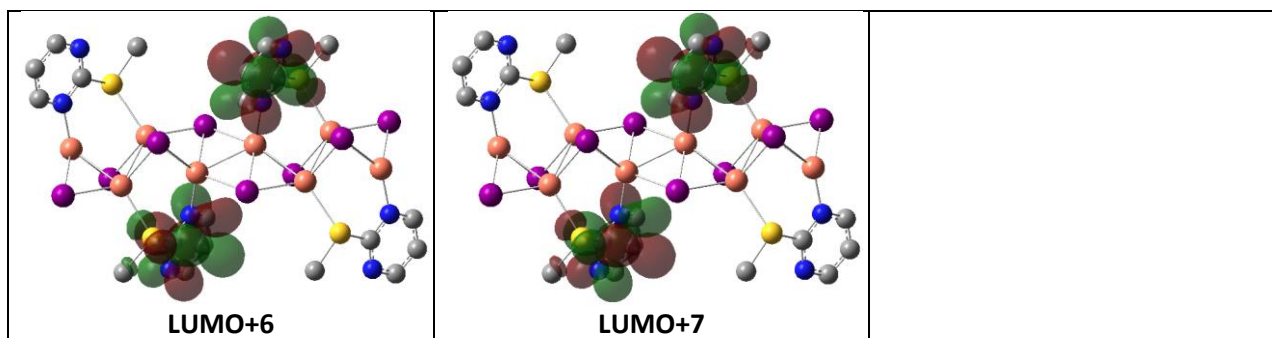

**Table S10.** Orbital energies and characters resulting from Mulliken population analysis calculated at the ground state ( $S_0$ ) optimized geometry of the model  $\{Cu_8I_8(L^1)_4\}$  (the complex  $[Cu_2L^1I_2]_n$ ).

| Orbital | Energy (eV) | Contributions (%) |      |      |
|---------|-------------|-------------------|------|------|
|         |             | Cu                | I    | L    |
| HOMO-31 | -0.2646     | 87.5              | 8.4  | 4.1  |
| HOMO-28 | -0.2601     | 91.4              | 5.2  | 3.4  |
| HOMO-24 | -0.2539     | 86.0              | 10.5 | 3.5  |
| HOMO-8  | -0.2156     | 41.6              | 50.0 | 8.4  |
| HOMO-7  | -0.2137     | 41.2              | 47.3 | 11.5 |
| HOMO-6  | -0.2103     | 51.2              | 47.3 | 1.5  |
| HOMO-5  | -0.2090     | 46.8              | 44.0 | 9.2  |
| HOMO-4  | -0.2080     | 35.0              | 61.3 | 3.7  |
| HOMO-3  | -0.2053     | 30.6              | 67.0 | 2.4  |
| HOMO-2  | -0.2035     | 43.1              | 53.9 | 3.0  |
| HOMO-1  | -0.1965     | 41.8              | 56.5 | 1.7  |
| HOMO    | -0.1916     | 43.0              | 54.5 | 2.5  |
| LUMO    | -0.0978     | 2.8               | 0.5  | 96.8 |
| LUMO+1  | -0.0978     | 2.8               | 0.5  | 96.8 |
| LUMO+2  | -0.0766     | 2.7               | 0.3  | 97.0 |
| LUMO+3  | -0.0759     | 2.5               | 0.6  | 96.9 |
| LUMO+4  | -0.0753     | 2.1               | 0.7  | 97.2 |
| LUMO+5  | -0.0752     | 1.7               | 0.7  | 97.6 |
| LUMO+6  | -0.0565     | 2.4               | 0.5  | 97.1 |
| LUMO+7  | -0.0563     | 2.2               | 0.6  | 97.2 |

**Table S11.** Excited state properties of the model  $\{Cu_8I_8(L^2)_4\}$  (the complex  $[Cu_2L^2I_2]_n$ ) obtained from TD-DFT calculations in Gaussian software at the relaxed geometry of the ground state ( $S_0$ ). Transitions with contribution >10% are shown.

| State | Energy (eV) | Energy (nm) | Contributions (%)                                                                                                                                           | Oscillator strength | Character |
|-------|-------------|-------------|-------------------------------------------------------------------------------------------------------------------------------------------------------------|---------------------|-----------|
| S1    | 2.0754      | 597         | HOMO $\rightarrow$ LUMO+1 (65.3 %),<br>HOMO-1 $\rightarrow$ LUMO (30.7 %)                                                                                   | 0.0055              |           |
| S2    | 2.3244      | 533         | HOMO-1 $\rightarrow$ LUMO (44.3 %),<br>HOMO $\rightarrow$ LUMO+1 (30.4 %),<br>HOMO-2 $\rightarrow$ LUMO+1 (16.8 %)                                          | 0.0054              |           |
| S3    | 2.3832      | 520         | HOMO-3 $\rightarrow$ LUMO (36.4 %),<br>HOMO-4 $\rightarrow$ LUMO+1 (24.7 %),<br>HOMO-2 $\rightarrow$ LUMO+1 (12.9 %),<br>HOMO-1 $\rightarrow$ LUMO (12.2 %) | 0.0002              |           |



|     |        |     |                                                                                                                                        |        |       |       |
|-----|--------|-----|----------------------------------------------------------------------------------------------------------------------------------------|--------|-------|-------|
| S4  | 2.4743 | 501 | HOMO-5 → LUMO (37.9 %),<br>HOMO-7 → LUMO+1 (21.8 %)                                                                                    | 0.0014 | XMLCT |       |
| S5  | 2.5339 | 489 | HOMO-2 → LUMO+1 (44.2 %),<br>HOMO-4 → LUMO+1 (17.9 %),<br>HOMO-10 → LUMO (13.1 %)                                                      | 0.0061 |       |       |
| S6  | 2.5716 | 482 | HOMO → LUMO+5 (67.3 %),<br>HOMO → LUMO+3 (12.4 %)                                                                                      | 0.0058 |       |       |
| S7  | 2.6094 | 475 | HOMO-6 → LUMO+1 (35.7 %),<br>HOMO-3 → LUMO (13.8 %),<br>HOMO-10 → LUMO (13.7 %),<br>HOMO-2 → LUMO+1 (12.8 %)                           | 0.0026 |       |       |
| S8  | 2.6507 | 468 | HOMO-8 → LUMO (25.6 %),<br>HOMO-6 → LUMO+1 (20.9 %),<br>HOMO-9 → LUMO+1 (15.4 %),<br>HOMO-3 → LUMO (10.7 %)                            | 0.0084 |       |       |
| S9  | 2.6679 | 465 | HOMO-8 → LUMO (25.6 %),<br>HOMO-6 → LUMO+1 (20.9 %),<br>HOMO-9 → LUMO+1 (15.4 %),<br>HOMO-3 → LUMO (10.7 %)                            | 0.0031 |       |       |
| S10 | 2.7457 | 452 | HOMO-4 → LUMO+1 (38.7 %),<br>HOMO-5 → LUMO (21.1 %),<br>HOMO-3 → LUMO (19.7 %)                                                         | 0.0006 |       |       |
| T1  | 2.0450 | 606 | HOMO → LUMO+1 (60.4 %),<br>HOMO-1 → LUMO (32.1 %)                                                                                      | 0.0000 |       | XMLCT |
| T2  | 2.3130 | 536 | HOMO-1 → LUMO (37.8 %),<br>HOMO → LUMO+1 (33.9 %),<br>HOMO-2 → LUMO+1 (18.8 %)                                                         | 0.0000 |       |       |
| T3  | 2.3725 | 523 | HOMO-3 → LUMO (31.5 %),<br>HOMO-4 → LUMO+1 (27.9 %),<br>HOMO-5 → LUMO (14.1 %),<br>HOMO-2 → LUMO+1 (11.1 %)                            | 0.0000 |       |       |
| T4  | 2.4385 | 508 | HOMO-7 → LUMO+1 (22.7 %),<br>HOMO-1 → LUMO (12.3 %),<br>HOMO-3 → LUMO (12.1 %)                                                         | 0.0000 |       |       |
| T5  | 2.5003 | 496 | HOMO → LUMO+2 (39.5 %),<br>HOMO → LUMO+4 (24.6 %)                                                                                      | 0.0000 |       |       |
| T6  | 2.5043 | 495 | HOMO-2 → LUMO+1 (37.1 %),<br>HOMO-4 → LUMO+1 (20.0 %),<br>HOMO-10 → LUMO (14.1 %)                                                      | 0.0000 |       |       |
| T7  | 2.5152 | 493 | HOMO → LUMO+5 (57.2 %),<br>HOMO-1 → LUMO+2 (10.6 %)                                                                                    | 0.0000 |       |       |
| T8  | 2.5869 | 479 | HOMO-6 → LUMO+1 (31.0 %),<br>HOMO-2 → LUMO+1 (12.1 %)                                                                                  | 0.0000 |       |       |
| T9  | 2.6277 | 472 | HOMO-8 → LUMO (24.0 %),<br>HOMO-9 → LUMO+1 (18.3 %),<br>HOMO-3 → LUMO (17.4 %),<br>HOMO-2 → LUMO+1 (10.7 %),<br>HOMO-5 → LUMO (10.3 %) | 0.0000 |       |       |
| T10 | 2.6559 | 467 | HOMO → LUMO+3 (55.0 %),<br>HOMO-1 → LUMO+2 (15.1 %),<br>HOMO-1 → LUMO+4 (13.7 %),<br>HOMO → LUMO+5 (10.9 %)                            | 0.0000 |       |       |

Table S12. Iso-surface contour plots (iso-value = 0.02) of the model  $\{\text{Cu}_8\text{L}_8(\text{L}^2)_4\}$  (the complex  $[\text{Cu}_2\text{L}^2\text{I}_2]_n$ ) as calculated in Gaussian software at the ground state ( $S_0$ ) geometry.

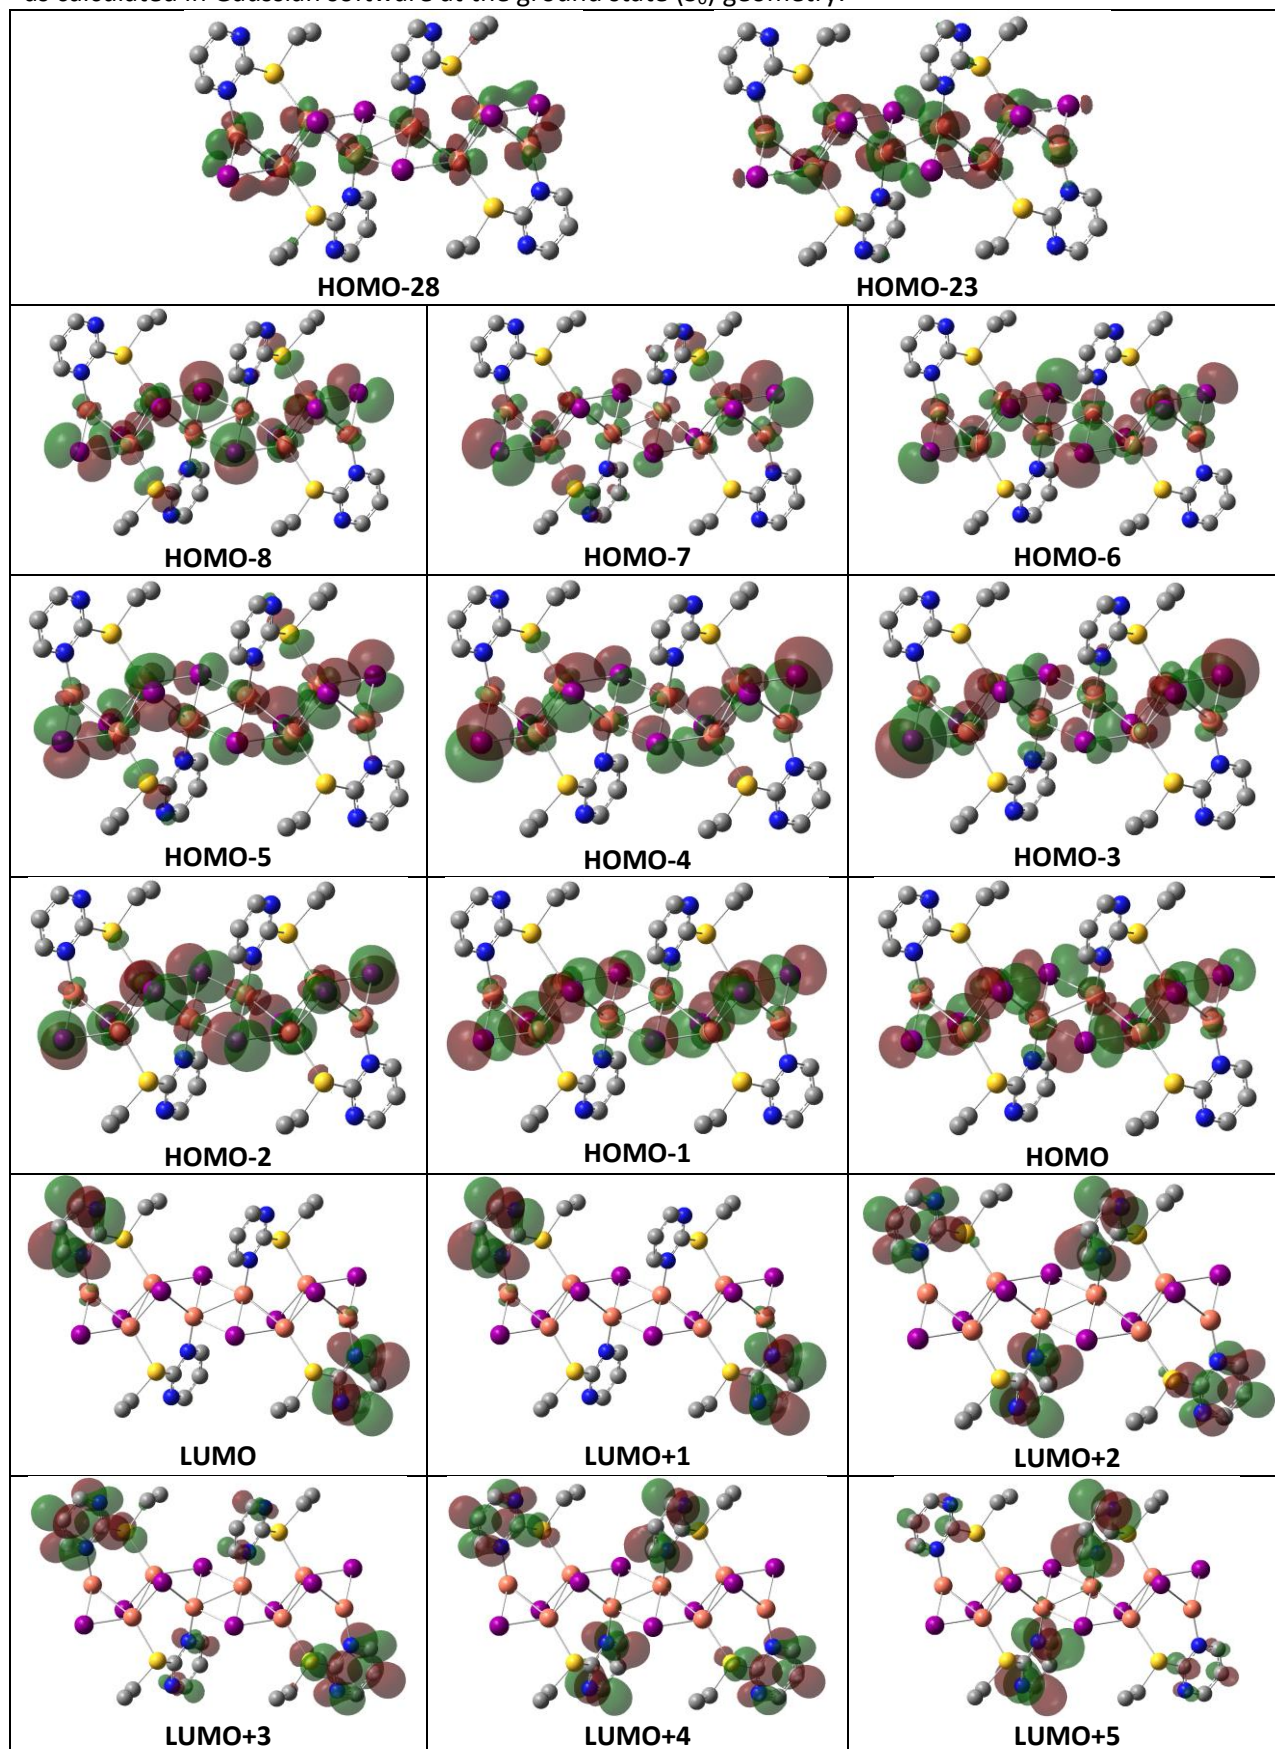

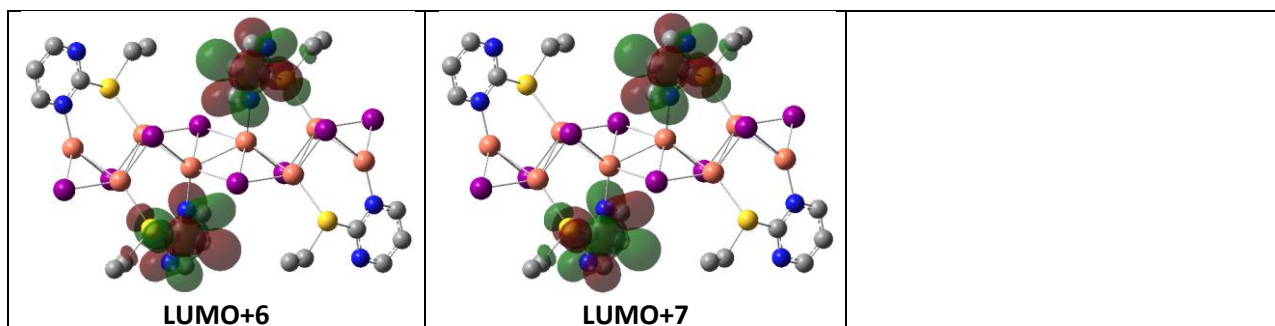

**Table S13.** Orbital energies and characters resulting from Mulliken population analysis calculated at the ground state ( $S_0$ ) optimized geometry of the model  $\{\text{Cu}_8\text{I}_8(\text{L}^2)_4\}$  (the complex  $[\text{Cu}_2\text{L}^2\text{I}_2]_n$ ).

| Orbital | Energy (eV) | Contributions (%) |      |      |
|---------|-------------|-------------------|------|------|
|         |             | Cu                | I    | L    |
| HOMO-28 | -0.2572     | 91.0              | 5.3  | 3.7  |
| HOMO-23 | -0.2513     | 87.1              | 9.6  | 3.3  |
| HOMO-8  | -0.2134     | 41.2              | 50.1 | 8.7  |
| HOMO-7  | -0.2114     | 41.8              | 45.7 | 12.5 |
| HOMO-6  | -0.2083     | 51.4              | 47.4 | 1.2  |
| HOMO-5  | -0.2064     | 46.0              | 45.3 | 8.7  |
| HOMO-4  | -0.2062     | 36.2              | 60.1 | 3.7  |
| HOMO-3  | -0.2035     | 32.5              | 64.5 | 3.0  |
| HOMO-2  | -0.2019     | 44.0              | 52.4 | 3.6  |
| HOMO-1  | -0.1943     | 41.9              | 56.3 | 1.8  |
| HOMO    | -0.1899     | 42.8              | 54.5 | 2.7  |
| LUMO    | -0.0957     | 2.8               | 0.5  | 96.7 |
| LUMO+1  | -0.0957     | 2.8               | 0.5  | 96.7 |
| LUMO+2  | -0.0744     | 2.8               | 0.3  | 96.9 |
| LUMO+3  | -0.0738     | 2.6               | 0.5  | 96.9 |
| LUMO+4  | -0.0731     | 2.1               | 0.7  | 97.2 |
| LUMO+5  | -0.0729     | 1.7               | 0.3  | 98.0 |
| LUMO+6  | -0.0544     | 2.3               | 0.5  | 97.2 |
| LUMO+7  | -0.0543     | 2.3               | 0.6  | 97.1 |

**Table S14.** Excited state properties of the model  $\{\text{Cu}_4\text{I}_4(\text{L}^2)_4\}$  (the complex  $[\text{CuL}^2\text{I}]_n$ ) obtained from TD-DFT calculations in Gaussian software at the relaxed geometry of the ground state ( $S_0$ ). Transitions with contribution >10% are shown.

| State | Energy (eV) | Energy (nm) | Contributions (%)                                                           | Oscillator strength | Character |
|-------|-------------|-------------|-----------------------------------------------------------------------------|---------------------|-----------|
| S1    | 1.9980      | 621         | HOMO $\rightarrow$ LUMO (84.4 %),<br>HOMO-2 $\rightarrow$ LUMO+1 (12.5 %)   | 0.0021              | XMLCT     |
| S2    | 2.2293      | 556         | HOMO-1 $\rightarrow$ LUMO (56.0 %),<br>HOMO-2 $\rightarrow$ LUMO+1 (27.1 %) | 0.0161              |           |
| S3    | 2.3249      | 533         | HOMO $\rightarrow$ LUMO+2 (87.8 %)                                          | 0.0158              |           |
| S4    | 2.3539      | 527         | HOMO-2 $\rightarrow$ LUMO+1 (54.1 %),<br>HOMO-1 $\rightarrow$ LUMO (36.3 %) | 0.0081              |           |
| S5    | 2.4600      | 504         | HOMO-3 $\rightarrow$ LUMO+1 (71.3 %),<br>HOMO-4 $\rightarrow$ LUMO (22.0 %) | 0.0060              |           |
| S6    | 2.5760      | 481         | HOMO-1 $\rightarrow$ LUMO+2 (77.4 %)                                        | 0.0122              |           |
| S7    | 2.5807      | 480         | HOMO-4 $\rightarrow$ LUMO (66.5 %),<br>HOMO-3 $\rightarrow$ LUMO+1 (19.7 %) | 0.0137              |           |
| S8    | 2.6480      | 468         | HOMO $\rightarrow$ LUMO+5 (84.4 %)                                          | 0.0034              |           |

|     |        |     |                                                                                                                 |        |       |
|-----|--------|-----|-----------------------------------------------------------------------------------------------------------------|--------|-------|
| S9  | 2.6576 | 467 | HOMO-4 → LUMO+2 (38.2 %),<br>HOMO-3 → LUMO+3 (19.8 %),<br>HOMO-1 → LUMO+2 (12.4 %),<br>HOMO-2 → LUMO+3 (12.2 %) | 0.0041 | XMLCT |
| S10 | 2.6864 | 462 | HOMO-5 → LUMO+1 (86.2 %)                                                                                        | 0.0039 |       |
| T1  | 1.9634 | 631 | HOMO → LUMO (77.0 %),<br>HOMO-2 → LUMO+1 (17.1 %)                                                               | 0.0000 |       |
| T2  | 2.1776 | 569 | HOMO-1 → LUMO (57.7 %),<br>HOMO-2 → LUMO+1 (18.6 %),<br>HOMO → LUMO (12.6 %)                                    | 0.0000 |       |
| T3  | 2.2390 | 554 | HOMO → LUMO+2 (82.5 %)                                                                                          | 0.0000 |       |
| T4  | 2.3346 | 531 | HOMO-2 → LUMO+1 (54.0 %),<br>HOMO-1 → LUMO (28.8 %)                                                             | 0.0000 |       |
| T5  | 2.4429 | 508 | HOMO-3 → LUMO+1 (64.9 %),<br>HOMO-4 → LUMO (26.7 %)                                                             | 0.0000 |       |
| T6  | 2.4922 | 498 | HOMO-1 → LUMO+2 (57.3 %),<br>HOMO-3 → LUMO+3 (17.0 %),<br>HOMO-4 → LUMO+2 (11.6 %)                              | 0.0000 |       |
| T7  | 2.5623 | 484 | HOMO-4 → LUMO (52.9 %),<br>HOMO-3 → LUMO+1 (26.2 %)                                                             | 0.0000 |       |
| T8  | 2.5997 | 477 | HOMO-4 → LUMO+2 (37.2 %),<br>HOMO-1 → LUMO+2 (26.7 %),<br>HOMO-5 → LUMO+3 (13.8 %),<br>HOMO-3 → LUMO+3 (12.8 %) | 0.0000 |       |
| T9  | 2.6381 | 470 | HOMO → LUMO+5 (85.0 %)                                                                                          | 0.0000 |       |
| T10 | 2.6751 | 463 | HOMO-5 → LUMO+1 (75.1 %),<br>HOMO-4 → LUMO (12.3 %)                                                             | 0.0000 |       |

Table S15. Iso-surface contour plots (iso-value = 0.02) of the model  $\{\text{Cu}_4\text{I}_4(\text{L}^2)_4\}$  (the complex  $[\text{CuL}^2\text{I}]_n$ ) as calculated in Gaussian software at the ground state ( $S_0$ ) geometry.

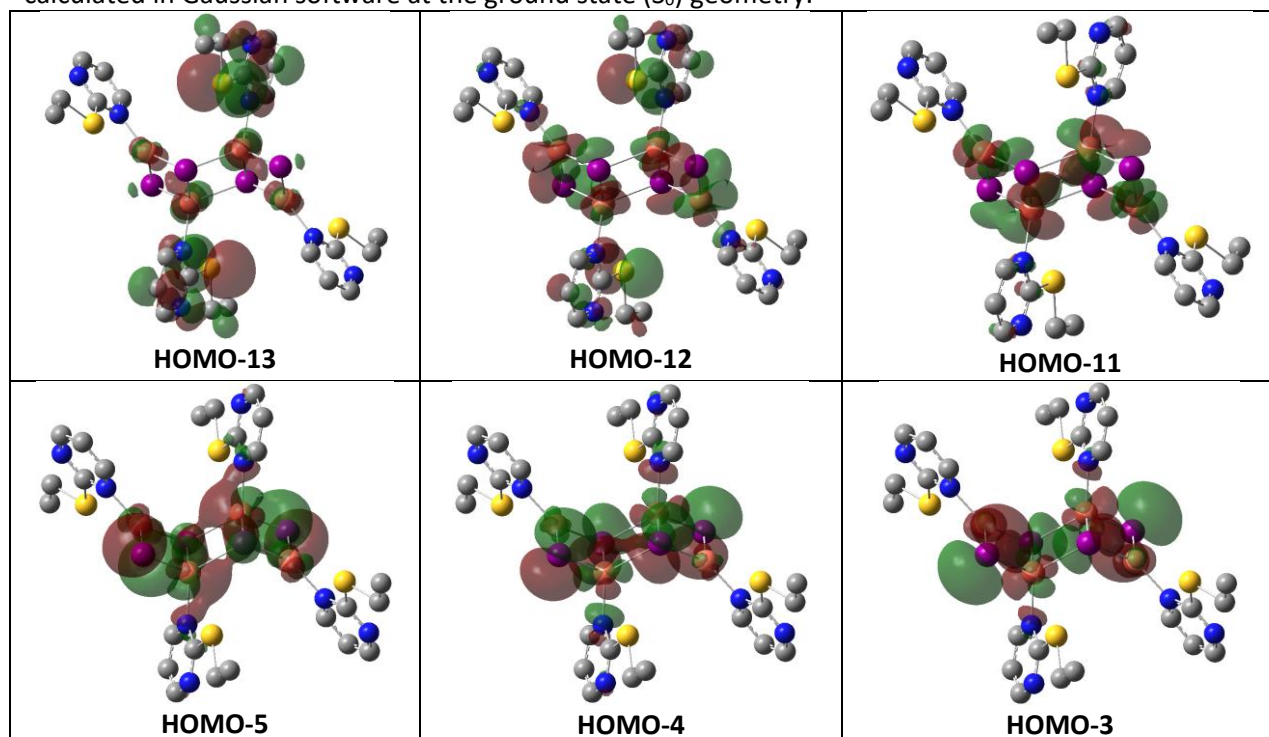

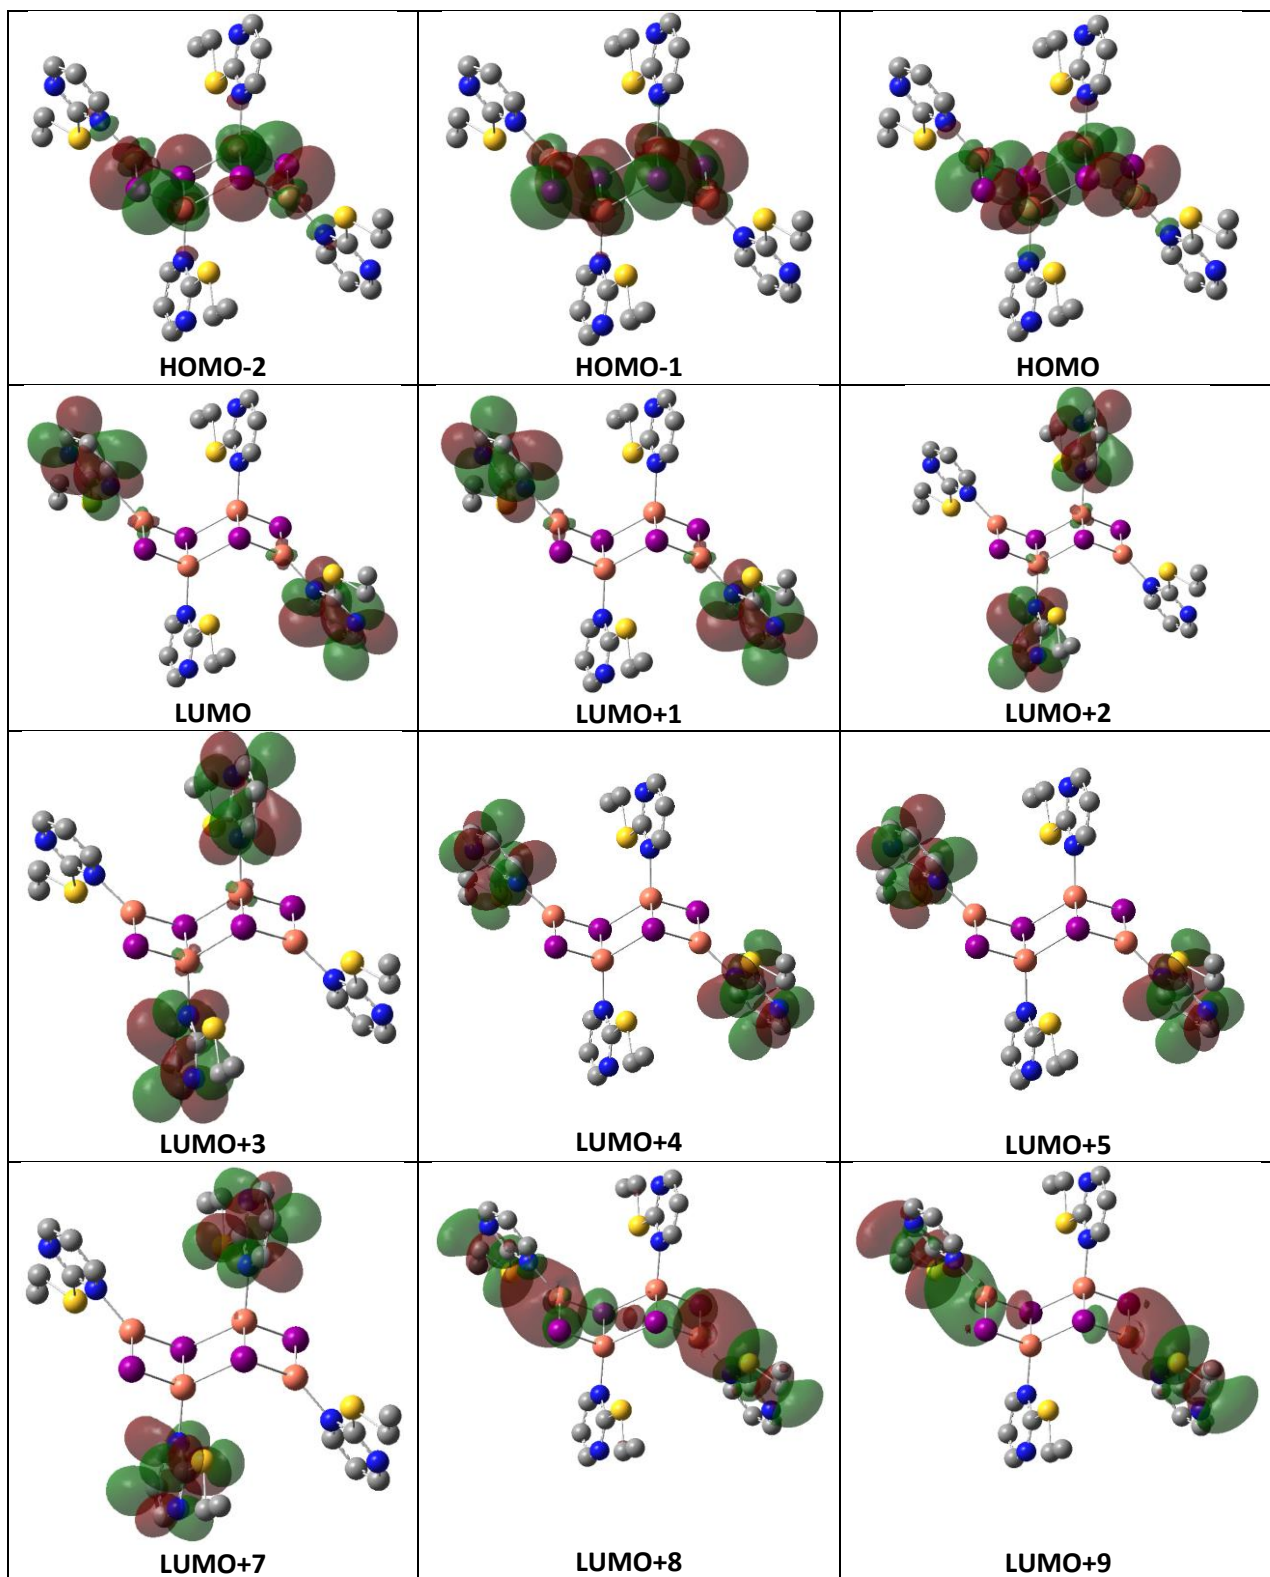

**Table S16.** Orbital energies and characters resulting from Mulliken population analysis calculated at the ground state ( $S_0$ ) optimized geometry of the model  $\{Cu_4I_4(L^2)_4\}$  (the complex  $[CuL^2I]_n$ ).

| Orbital | Energy (eV) | Contributions (%) |      |      |
|---------|-------------|-------------------|------|------|
|         |             | Cu                | I    | L    |
| HOMO-13 | -0.2293     | 21.7              | 3.0  | 75.3 |
| HOMO-12 | -0.2270     | 53.9              | 12.8 | 33.3 |
| HOMO-11 | -0.2246     | 82.1              | 12.6 | 5.3  |
| HOMO-5  | -0.1921     | 57.6              | 36.6 | 5.8  |
| HOMO-4  | -0.1879     | 49.8              | 44.0 | 6.2  |
| HOMO-3  | -0.1860     | 37.7              | 59.1 | 3.2  |
| HOMO-2  | -0.1802     | 45.0              | 50.4 | 4.6  |
| HOMO-1  | -0.1786     | 48.5              | 49.6 | 1.9  |
| HOMO    | -0.1697     | 45.5              | 50.8 | 3.7  |
| LUMO    | -0.0768     | 2.1               | 0.3  | 97.6 |
| LUMO+1  | -0.0767     | 2.0               | 0.4  | 97.6 |
| LUMO+2  | -0.0618     | 1.6               | 0.5  | 97.9 |
| LUMO+3  | -0.0618     | 1.6               | 0.5  | 97.9 |
| LUMO+4  | -0.0538     | 1.2               | 0.2  | 98.6 |
| LUMO+5  | -0.0539     | 1.1               | 0.2  | 98.7 |
| LUMO+7  | -0.0404     | 1.1               | 0.2  | 98.7 |
| LUMO+8  | 0.0022      | 45.6              | 4.8  | 49.6 |
| LUMO+9  | 0.0058      | 29.1              | 2.5  | 68.4 |

**Table S17.** Excited state properties of the model  $\{Cu_8I_8(L^1)_4\}$  (the complex  $[Cu_2L^1I_2]_n$ ) obtained from TD-DFT calculations in Gaussian software at the relaxed geometry of the lowest triplet excited state ( $T_1$ ). Transitions with contribution >10% are shown.

| State | Energy (eV) | Energy (nm) | Contributions (%)                                                                                                    | Oscillator strength | Character |
|-------|-------------|-------------|----------------------------------------------------------------------------------------------------------------------|---------------------|-----------|
| S1    | 1.8052      | 687         | HOMO $\rightarrow$ LUMO (72.5 %),<br>HOMO-1 $\rightarrow$ LUMO+1 (24.9 %)                                            | 0.0071              | XMLCT     |
| S2    | 2.0368      | 609         | HOMO-1 $\rightarrow$ LUMO+1 (46.2 %),<br>HOMO $\rightarrow$ LUMO (22.9 %),<br>HOMO-2 $\rightarrow$ LUMO (20.6 %)     | 0.0071              |           |
| S3    | 2.0965      | 591         | HOMO-3 $\rightarrow$ LUMO+1 (37.2 %),<br>HOMO-4 $\rightarrow$ LUMO (26.1 %),<br>HOMO-1 $\rightarrow$ LUMO+1 (15.8 %) | 0.0001              |           |
| T1    | 1.7688      | 701         | HOMO $\rightarrow$ LUMO (65.4 %),<br>HOMO-1 $\rightarrow$ LUMO+1 (27.9 %)                                            | 0.0000              | XMLCT     |
| T2    | 2.0211      | 613         | HOMO-1 $\rightarrow$ LUMO+1 (38.4 %),<br>HOMO $\rightarrow$ LUMO (28.2 %),<br>HOMO-2 $\rightarrow$ LUMO (22.5 %)     | 0.0000              |           |
| T3    | 2.0814      | 596         | HOMO-3 $\rightarrow$ LUMO+1 (33.1 %),<br>HOMO-4 $\rightarrow$ LUMO (29.0 %),<br>HOMO-1 $\rightarrow$ LUMO+1 (11.4 %) | 0.0000              |           |

**Table S18.** Iso-surface contour plots (iso-value = 0.02) of the model  $\{\text{Cu}_8\text{l}_8(\text{L}^1)_4\}$  (the complex  $[\text{Cu}_2\text{L}^1\text{I}_2]_n$ ) as calculated in Gaussian software at the lowest triplet excited state ( $T_1$ ) geometry.

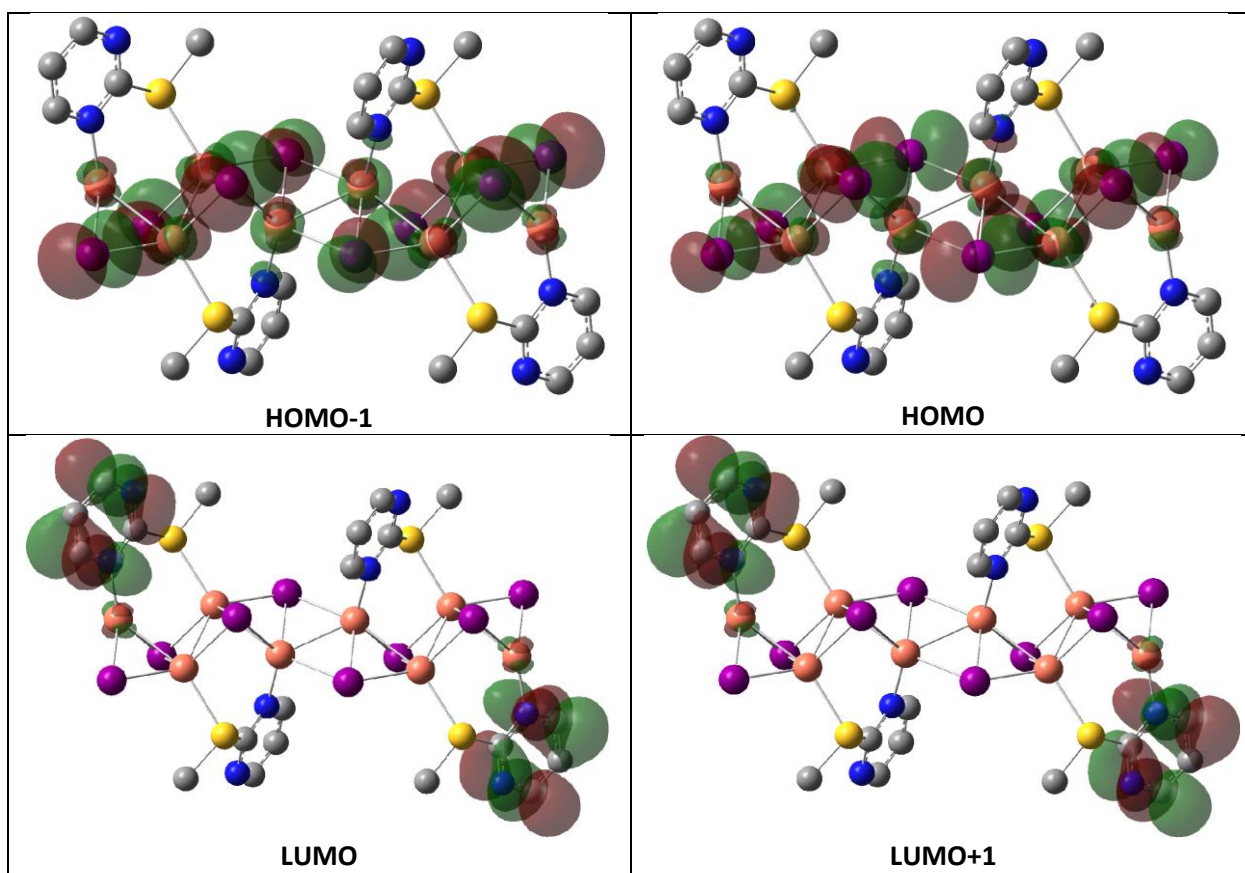

**Table S19.** Orbital energies and characters resulting from Mulliken population analysis calculated at the lowest triplet excited state ( $T_1$ ) optimized geometry of the model  $\{\text{Cu}_8\text{l}_8(\text{L}^1)_4\}$  (the complex  $[\text{Cu}_2\text{L}^1\text{I}_2]_n$ ).

| Orbital | Energy (eV) | Contributions (%) |      |      |
|---------|-------------|-------------------|------|------|
|         |             | Cu                | I    | L    |
| HOMO-1  | -0.1951     | 41.7              | 56.5 | 1.8  |
| HOMO    | -0.1898     | 43.2              | 53.9 | 2.9  |
| LUMO    | -0.1067     | 2.9               | 0.5  | 96.6 |
| LUMO+1  | -0.1067     | 2.9               | 0.6  | 96.5 |

**Table S20.** Excited state properties of the model  $\{\text{Cu}_8\text{l}_8(\text{L}^2)_4\}$  (the complex  $[\text{Cu}_2\text{L}^2\text{I}_2]_n$ ) obtained from TD-DFT calculations in Gaussian software at the relaxed geometry of the lowest triplet excited state ( $T_1$ ). Transitions with contribution >10% are shown.

| State | Energy (eV) | Energy (nm) | Contributions (%)                                                                                                    | Oscillator strength | Character |
|-------|-------------|-------------|----------------------------------------------------------------------------------------------------------------------|---------------------|-----------|
| S1    | 1.7821      | 696         | HOMO $\rightarrow$ LUMO (68.6 %),<br>HOMO-1 $\rightarrow$ LUMO+1 (28.2 %)                                            | 0.0066              | XMLCT     |
| S2    | 2.0196      | 614         | HOMO-1 $\rightarrow$ LUMO+1 (49.5 %),<br>HOMO $\rightarrow$ LUMO (28.1 %),<br>HOMO-2 $\rightarrow$ LUMO (16.2 %)     | 0.0067              |           |
| S3    | 2.0829      | 595         | HOMO-3 $\rightarrow$ LUMO+1 (36.3 %),<br>HOMO-4 $\rightarrow$ LUMO (30.1 %),<br>HOMO-5 $\rightarrow$ LUMO+1 (10.9 %) | 0.0004              |           |

|    |        |     |                                                                                  |        |       |
|----|--------|-----|----------------------------------------------------------------------------------|--------|-------|
| T1 | 1.7457 | 710 | HOMO → LUMO (62.1 %),<br>HOMO-1 → LUMO+1 (30.5 %)                                | 0.0000 | XMLCT |
| T2 | 2.0048 | 618 | HOMO-1 → LUMO+1 (40.2 %),<br>HOMO → LUMO (32.4 %),<br>HOMO-2 → LUMO (19.3 %)     | 0.0000 |       |
| T3 | 2.0709 | 599 | HOMO-4 → LUMO (32.9 %),<br>HOMO-3 → LUMO+1 (31.4 %),<br>HOMO-5 → LUMO+1 (15.6 %) | 0.0000 |       |

Table S21. Iso-surface contour plots (iso-value = 0.02) of the model  $\{\text{Cu}_8\text{l}_8(\text{L}^2)_4\}$  (the complex  $[\text{Cu}_2\text{L}^2\text{I}_2]_n$ ) as calculated in Gaussian software at the lowest triplet excited state ( $T_1$ ) geometry.

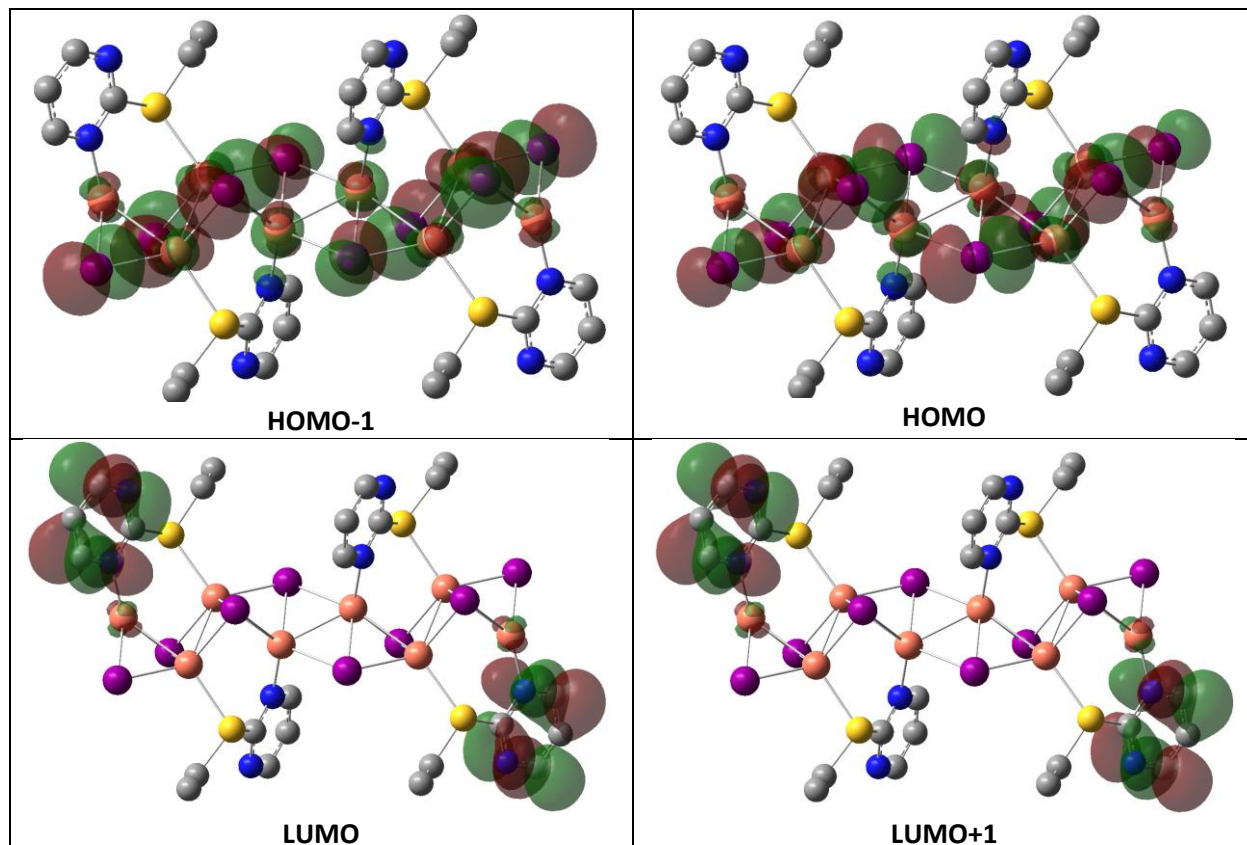

Table S22. Orbital energies and characters resulting from Mulliken population analysis calculated at the lowest triplet excited state ( $T_1$ ) optimized geometry of the model  $\{\text{Cu}_8\text{l}_8(\text{L}^2)_4\}$  (the complex  $[\text{Cu}_2\text{L}^2\text{I}_2]_n$ ).

| Orbital | Energy (eV) | Contributions (%) |      |      |
|---------|-------------|-------------------|------|------|
|         |             | Cu                | I    | L    |
| HOMO-1  | -0.1930     | 41.7              | 56.2 | 2.1  |
| HOMO    | -0.1884     | 42.9              | 54.1 | 3.0  |
| LUMO    | -0.1056     | 2.9               | 0.5  | 96.6 |
| LUMO+1  | -0.0739     | 2.9               | 0.6  | 96.5 |



**Table S23.** Excited state properties of the model  $\{\text{Cu}_4\text{I}_4(\text{L}^2)_4\}$  (the complex  $[\text{CuL}^2\text{I}]_n$ ) obtained from TD-DFT calculations in Gaussian software at the relaxed geometry of the lowest triplet excited state ( $T_1$ ). Transitions with contribution >10% are shown.

| State | Energy (eV) | Energy (nm) | Contributions (%)                                                                                                  | Oscillator strength | Character |
|-------|-------------|-------------|--------------------------------------------------------------------------------------------------------------------|---------------------|-----------|
| S1    | 1.5867      | 781         | HOMO $\rightarrow$ LUMO (93.2 %)                                                                                   | 0.0027              | XMLCT     |
| S2    | 1.9702      | 629         | HOMO-2 $\rightarrow$ LUMO+1 (57.8 %),<br>HOMO-1 $\rightarrow$ LUMO (30.7 %)                                        | 0.0227              |           |
| S3    | 2.0117      | 616         | HOMO-1 $\rightarrow$ LUMO (64.9 %),<br>HOMO-2 $\rightarrow$ LUMO+1 (30.9 %)                                        | 0.0159              |           |
| T1    | 1.5593      | 795         | HOMO $\rightarrow$ LUMO (90.0 %)                                                                                   | 0.0000              | XMLCT     |
| T2    | 1.8684      | 664         | HOMO-1 $\rightarrow$ LUMO (66.0 %),<br>HOMO-2 $\rightarrow$ LUMO+1 (14.8 %)                                        | 0.0000              |           |
| T3    | 1.9780      | 627         | HOMO-2 $\rightarrow$ LUMO+1 (57.3 %),<br>HOMO-1 $\rightarrow$ LUMO (16.6 %),<br>HOMO $\rightarrow$ LUMO+3 (12.2 %) | 0.0000              |           |

**Table S24.** Iso-surface contour plots (iso-value = 0.02) of the model  $\{\text{Cu}_4\text{I}_4(\text{L}^2)_4\}$  (the complex  $[\text{CuL}^2\text{I}]_n$ ) as calculated in Gaussian software at the lowest triplet excited state ( $T_1$ ) geometry.

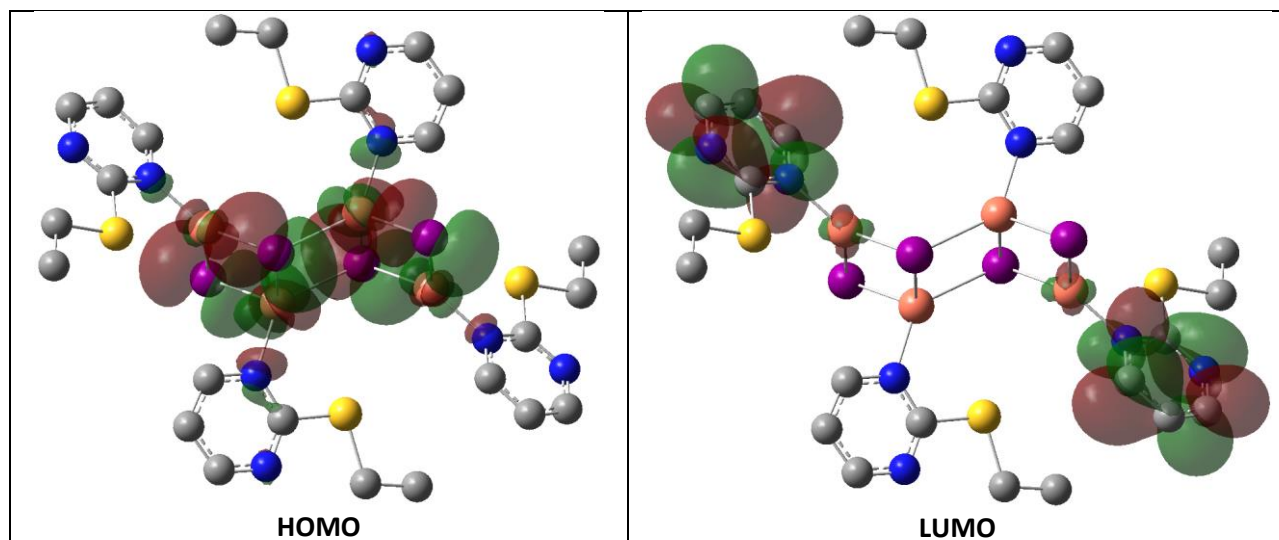

**Table S25.** Orbital energies and characters resulting from Mulliken population analysis calculated at the lowest triplet excited state ( $T_1$ ) optimized geometry of the model  $\{\text{Cu}_4\text{I}_4(\text{L}^2)_4\}$  (the complex  $[\text{CuL}^2\text{I}]_n$ ).

| Orbital | Energy (eV) | Contributions (%) |      |      |
|---------|-------------|-------------------|------|------|
|         |             | Cu                | I    | L    |
| HOMO    | -0.1635     | 45.4              | 49.9 | 4.7  |
| LUMO    | -0.0867     | 2.3               | 0.8  | 96.9 |

Table S26. Spin-orbit couplings  $\langle S_i | H_{so} | T_j \rangle$  calculated as root mean squares in ADF for the model  $\{Cu_4I_4(L^2)_4\}$  (the complex  $[CuL^2I]_n$ ).

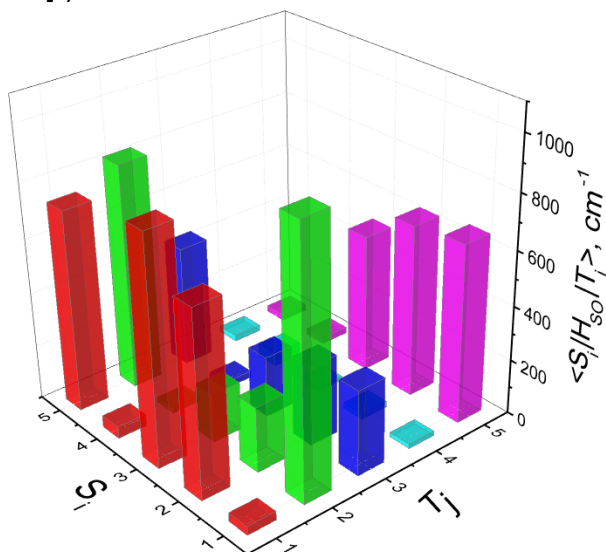

| $\langle S_i   H_{so}   T_j \rangle, \text{cm}^{-1}$ | T1     | T2     | T3     | T4    | T5     |
|------------------------------------------------------|--------|--------|--------|-------|--------|
| S1                                                   | 32,13  | 966,05 | 313,28 | 16,69 | 653,16 |
| S2                                                   | 678,9  | 240,35 | 292,17 | 21,4  | 632,32 |
| S3                                                   | 837,18 | 178,21 | 223,65 | 15,26 | 507,9  |
| S4                                                   | 43,5   | 19     | 24,52  | 47,74 | 23,23  |
| S5                                                   | 738,09 | 826,23 | 445,51 | 21,95 | 22,38  |

Table S27. Excited state properties of the model  $\{Cu_4I_4(L^2)_4\}$  (the complex  $[CuL^2I]_n$ ) obtained from TD-DFT calculations in Gaussian software at the relaxed geometry of the lowest singlet excited state ( $S_1$ ). Transitions with contribution  $>10\%$  are shown.

| State | Energy (eV) | Energy (nm) | Contributions (%)                                                           | Oscillator strength | Character |
|-------|-------------|-------------|-----------------------------------------------------------------------------|---------------------|-----------|
| S1    | 1.6607      | 747         | HOMO $\rightarrow$ LUMO (90.2 %)                                            | 0.0022              | XMLCT     |
| S2    | 1.9673      | 630         | HOMO-2 $\rightarrow$ LUMO+1 (33.4 %),<br>HOMO-1 $\rightarrow$ LUMO (54.0 %) | 0.0176              |           |
| S3    | 2.0547      | 603         | HOMO-1 $\rightarrow$ LUMO (40.6 %),<br>HOMO-2 $\rightarrow$ LUMO+1 (51.6 %) | 0.0085              |           |
| T1    | 1.6296      | 761         | HOMO $\rightarrow$ LUMO (85.4 %)                                            | 0.0000              | XMLCT     |
| T2    | 1.8973      | 653         | HOMO-1 $\rightarrow$ LUMO (62.1 %),<br>HOMO-2 $\rightarrow$ LUMO+1 (19.6 %) | 0.0000              |           |
| T3    | 2.0281      | 611         | HOMO-2 $\rightarrow$ LUMO+1 (57.8 %),<br>HOMO-1 $\rightarrow$ LUMO (24.4 %) | 0.0000              |           |

**Table S28.** Iso-surface contour plots (iso-value = 0.02) of the model  $\{\text{Cu}_4\text{I}_4(\text{L}^2)_4\}$  (the complex  $[\text{CuL}^2\text{I}]_n$ ) as calculated in Gaussian software at the lowest singlet excited state ( $S_1$ ) geometry.

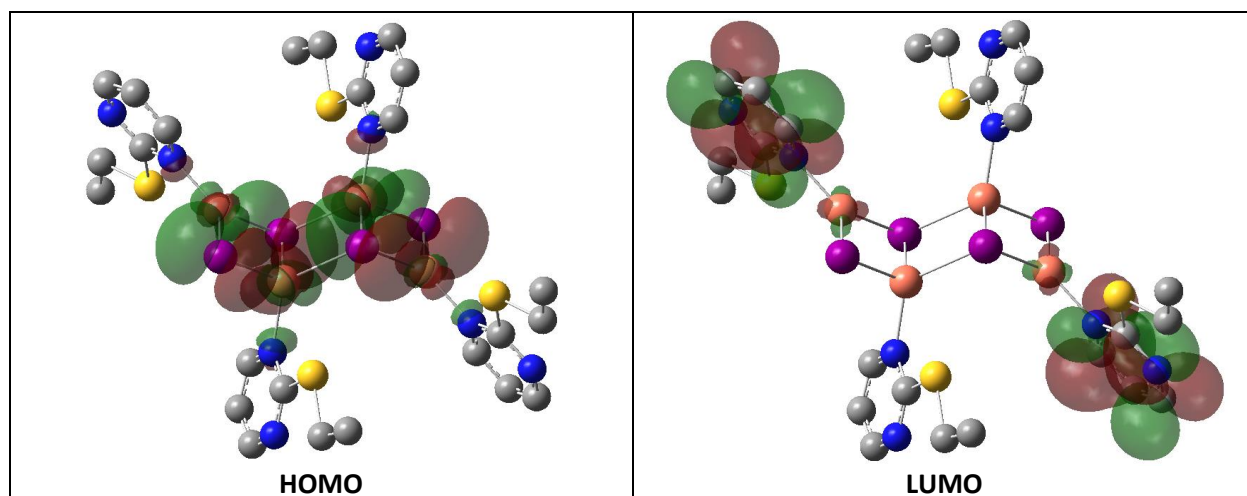

**Table S29.** Orbital energies and characters resulting from Mulliken population analysis calculated at the lowest singlet excited state ( $S_1$ ) optimized geometry of the model  $\{\text{Cu}_4\text{I}_4(\text{L}^2)_4\}$  (the complex  $[\text{CuL}^2\text{I}]_n$ ).

| Orbital | Energy (eV) | Contributions (%) |      |      |
|---------|-------------|-------------------|------|------|
|         |             | Cu                | I    | L    |
| HOMO    | -0.1662     | 45.2              | 50.7 | 4.1  |
| LUMO    | -0.0862     | 2.4               | 0.5  | 97.1 |

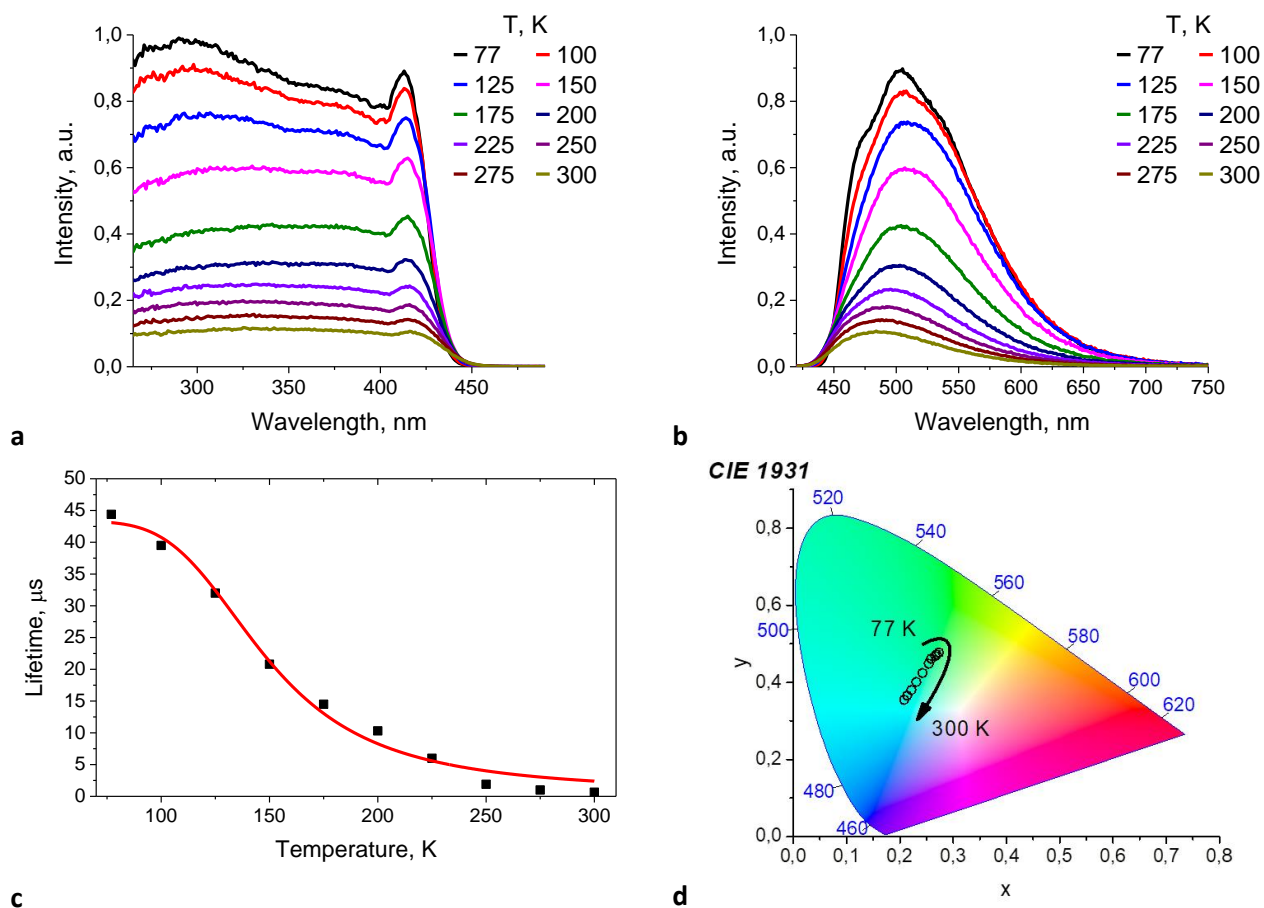

Figure S8. Luminescence properties of the complex  $[\text{Cu}_2\text{L}^2\text{I}_2]_n$ . Temperature dependence a) of the excitation spectra,  $\lambda_{\text{em}} = 500 \text{ nm}$ ; b) of the luminescence spectra,  $\lambda_{\text{ex}} = 410 \text{ nm}$ ; c) of the photoluminescence decay time; d) of the photoluminescence chromaticity,  $\lambda_{\text{ex}} = 410 \text{ nm}$ .

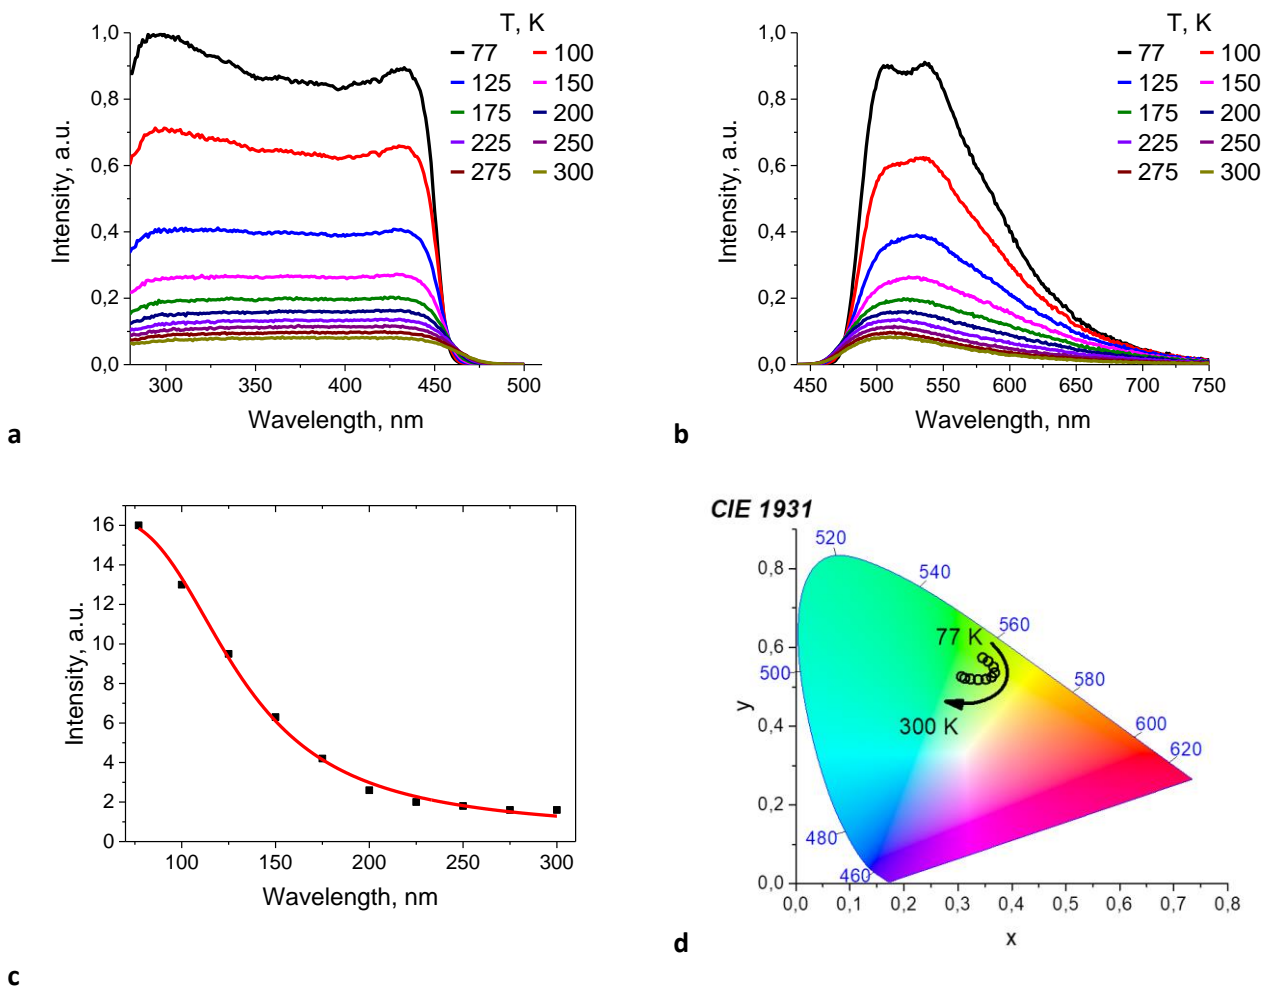

Figure S9. Luminescence properties of the complex  $[\text{CuL}^2\text{I}]_n$ . Temperature dependence a) of the excitation spectra,  $\lambda_{\text{em}} = 510$  nm; b) of the luminescence spectra,  $\lambda_{\text{ex}} = 430$  nm; c) of the photoluminescence decay time; d) of the photoluminescence chromaticity,  $\lambda_{\text{ex}} = 410$  nm.

Table S30. The emission spectra of the complex  $[\text{Cu}_2\text{L}^1\text{I}_2]_n$  at  $T = 77\text{--}300\text{ K}$  resolved into four Gauss functions.

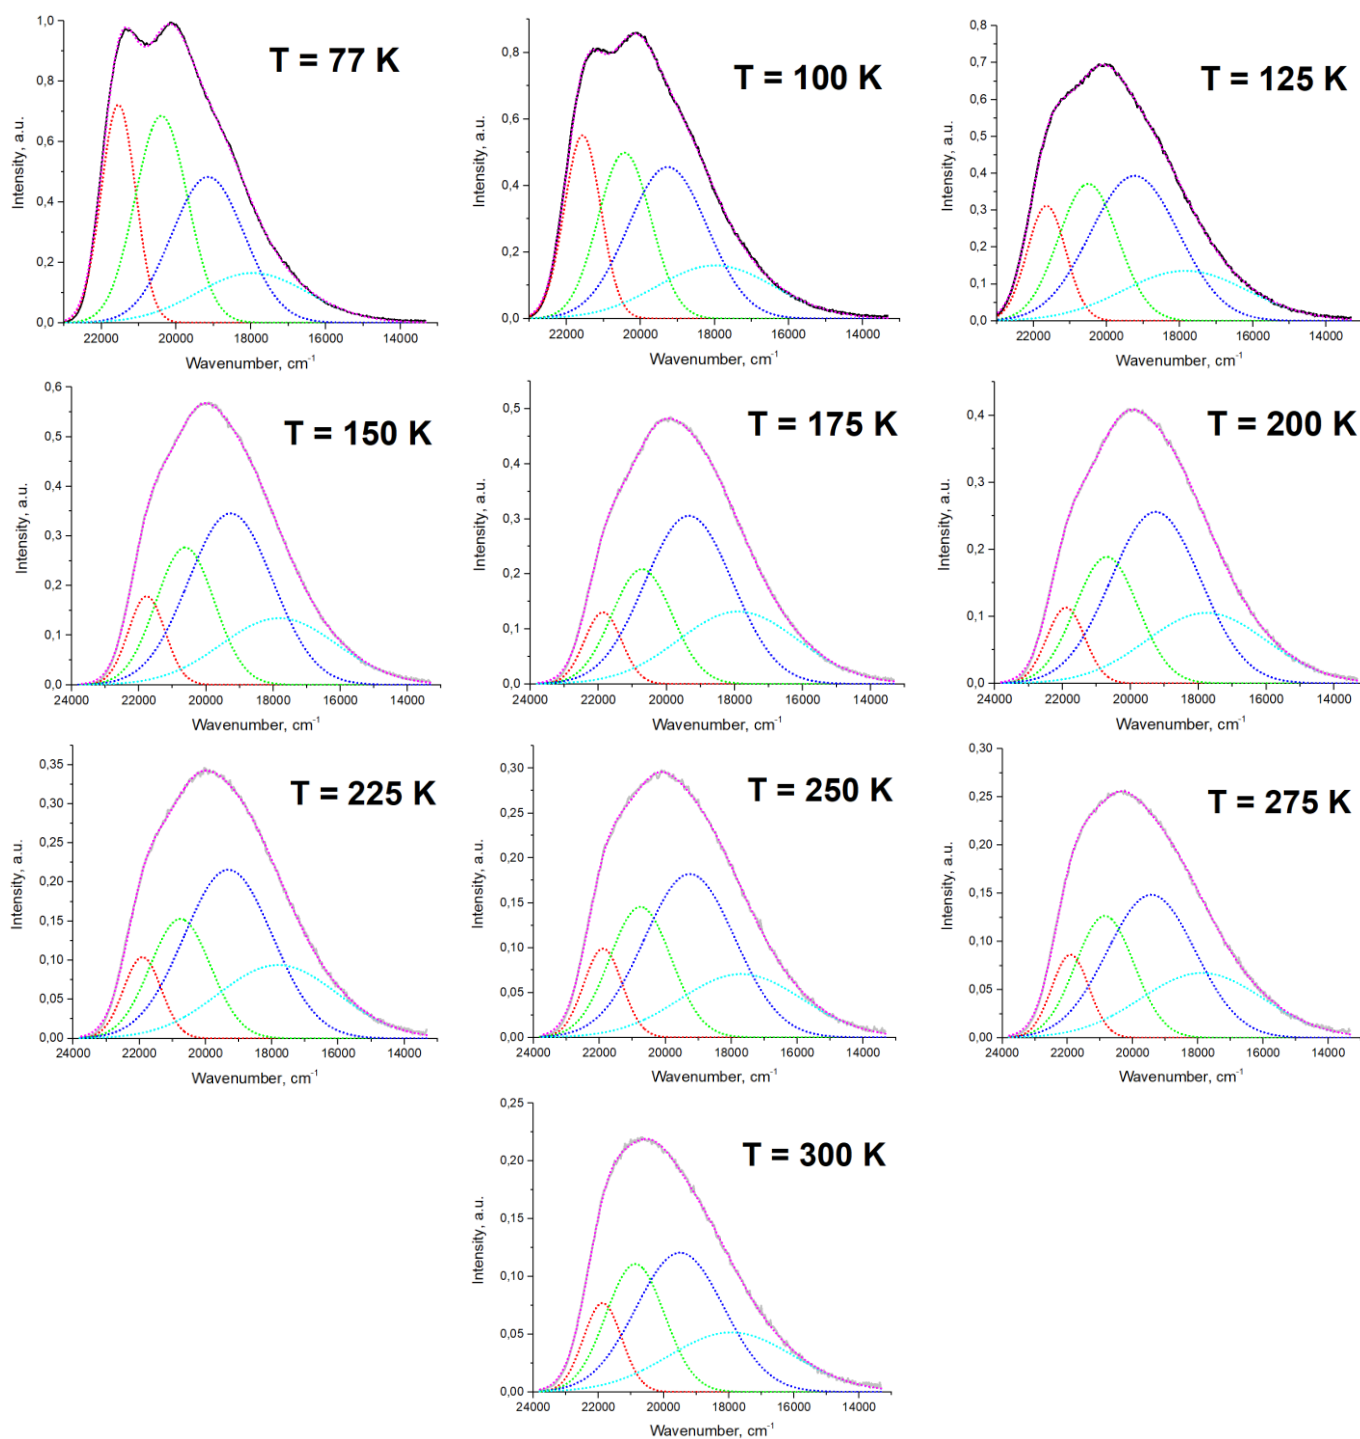

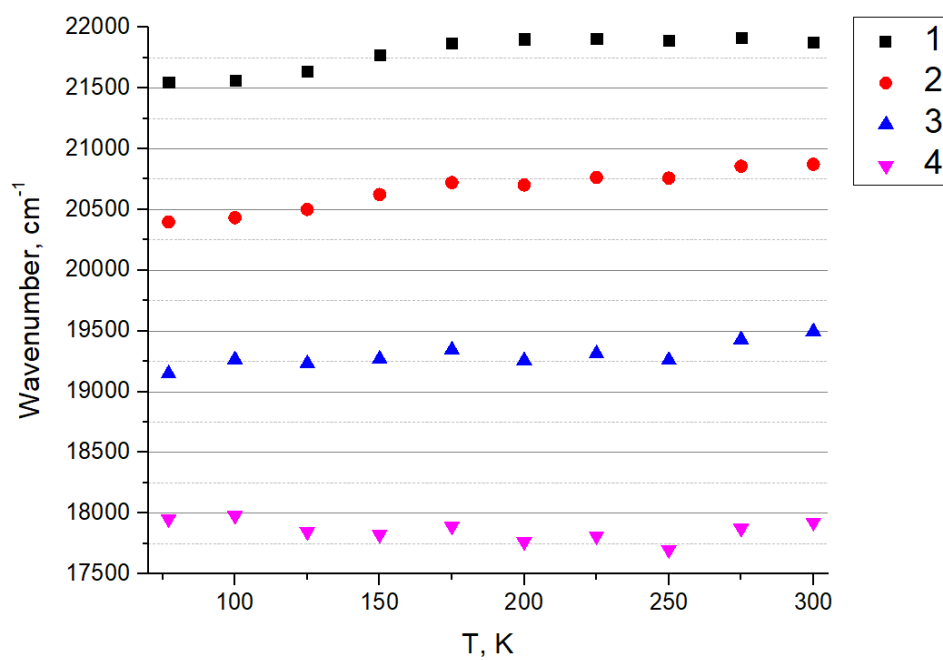

Figure S10. Temperature dependence of the maxima of the Gauss functions for the complex  $[\text{Cu}_2\text{L}^1\text{I}_2]_n$ .

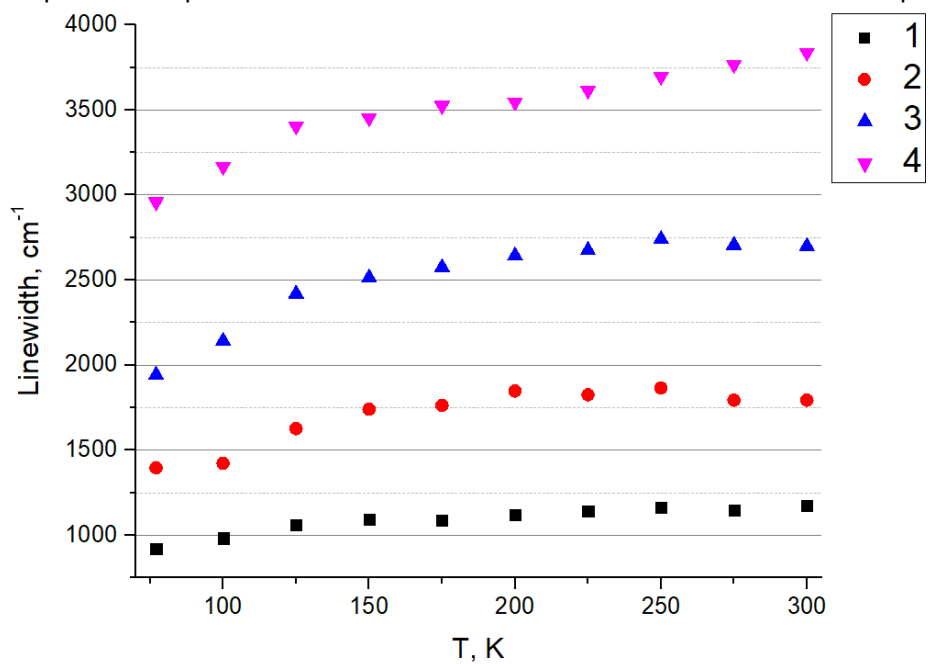

Figure S11. Temperature dependence of the linewidth of the Gauss functions for the complex  $[\text{Cu}_2\text{L}^1\text{I}_2]_n$ .

Table S31. The emission spectra of the complex  $[\text{Cu}_2\text{L}^2\text{I}_2]_n$  at  $T = 77\text{--}300\text{ K}$  resolved into four Gauss functions.

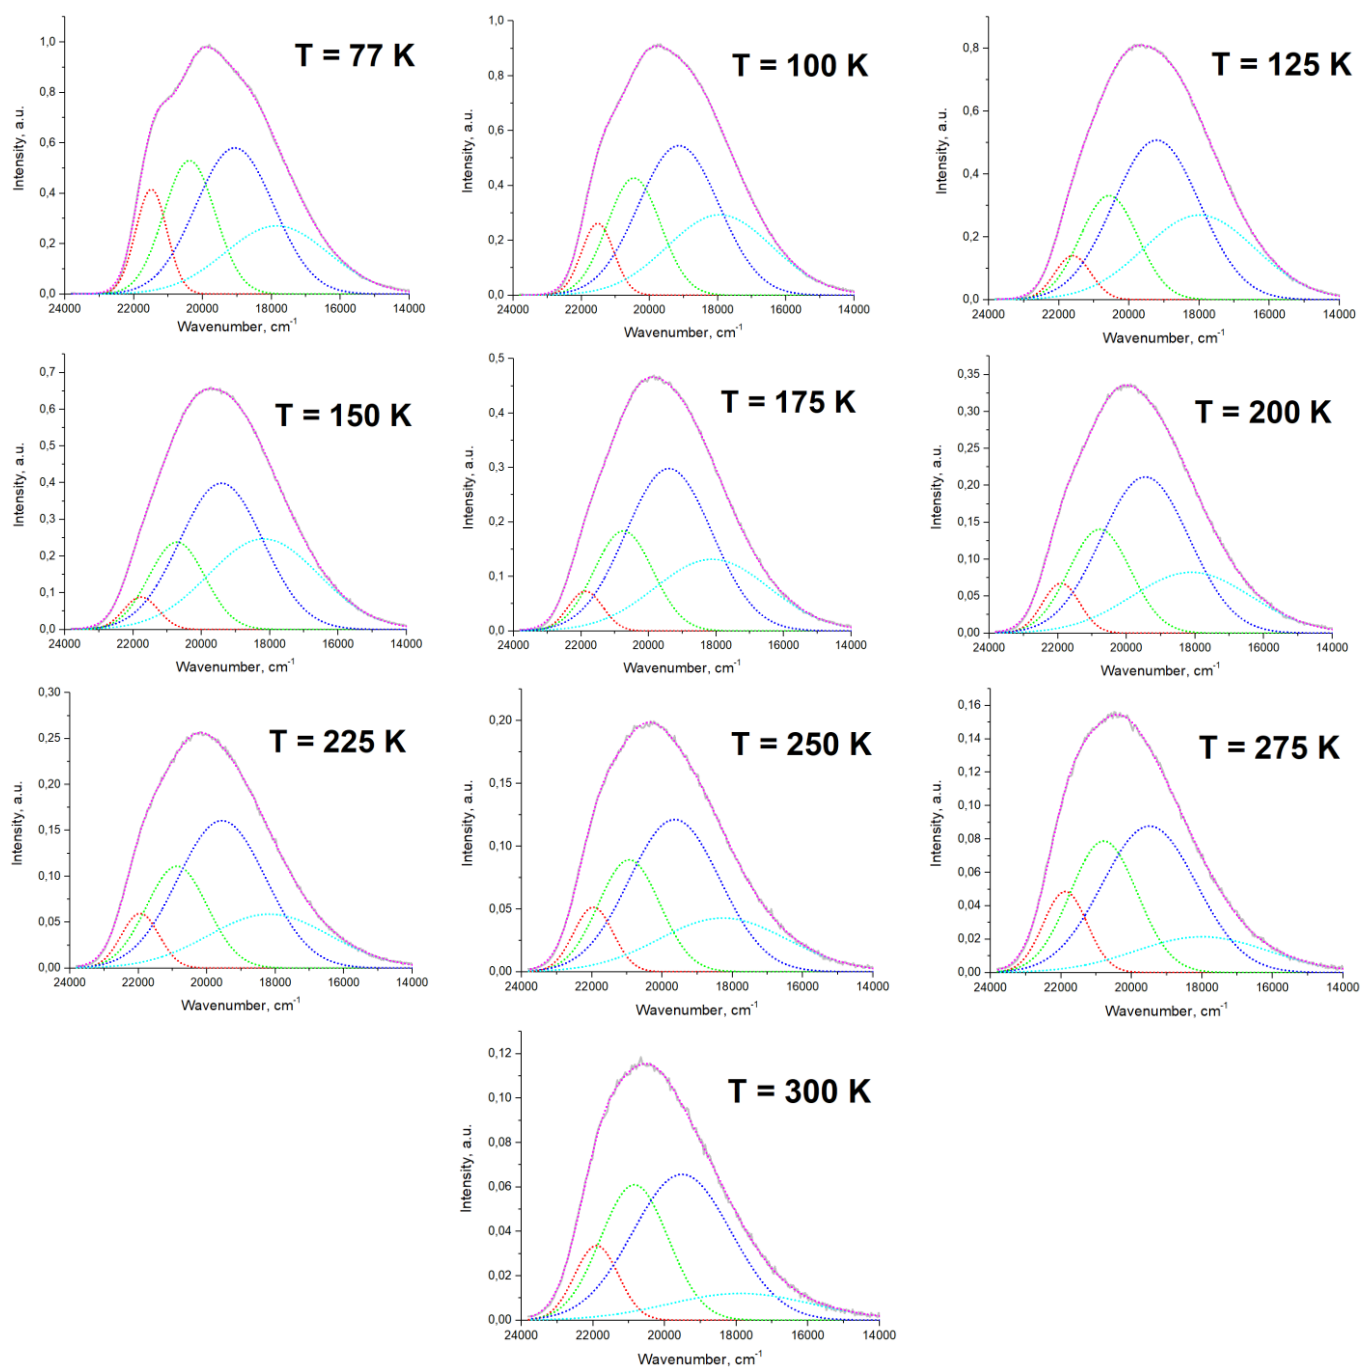



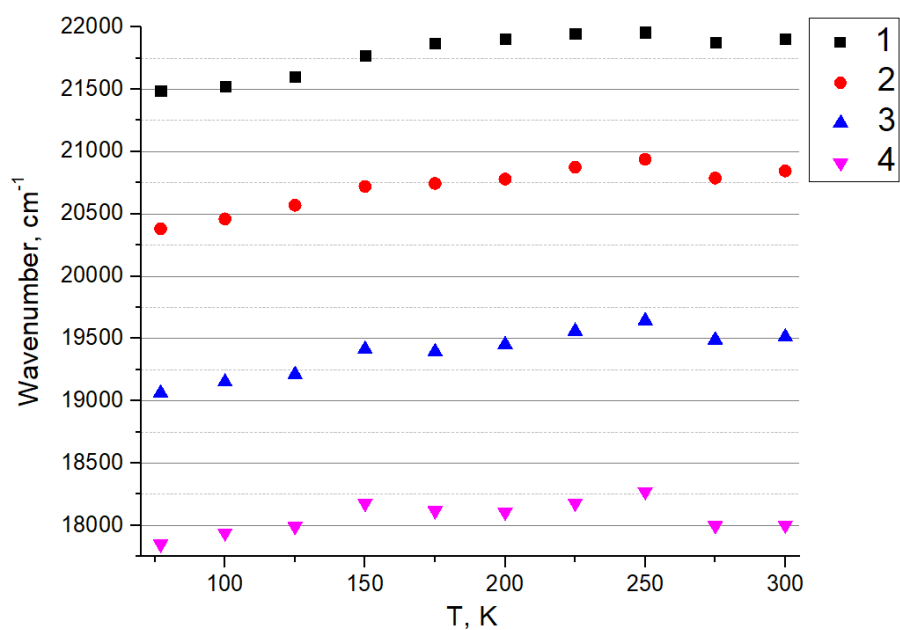

Figure S12. Temperature dependence of the maxima of the Gauss functions for the complex  $[\text{Cu}_2\text{L}^2\text{I}_2]_n$ .

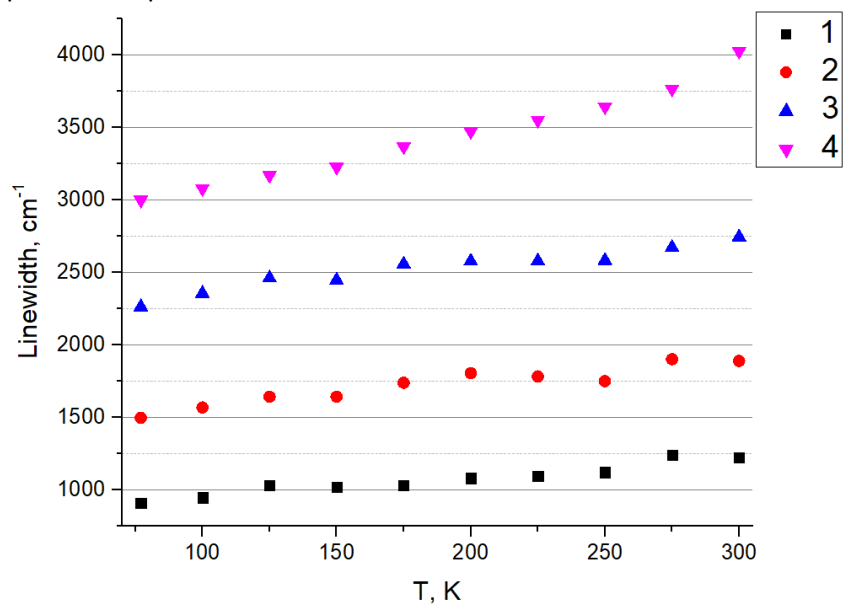

Figure S13. Temperature dependence of the linewidth of the Gauss functions for the complex  $[\text{Cu}_2\text{L}^2\text{I}_2]_n$ .

Table S32. The emission spectra of the complex  $[\text{CuL}^2\text{I}]_n$  at  $T = 77\text{--}300\text{ K}$  resolved into four Gauss functions.

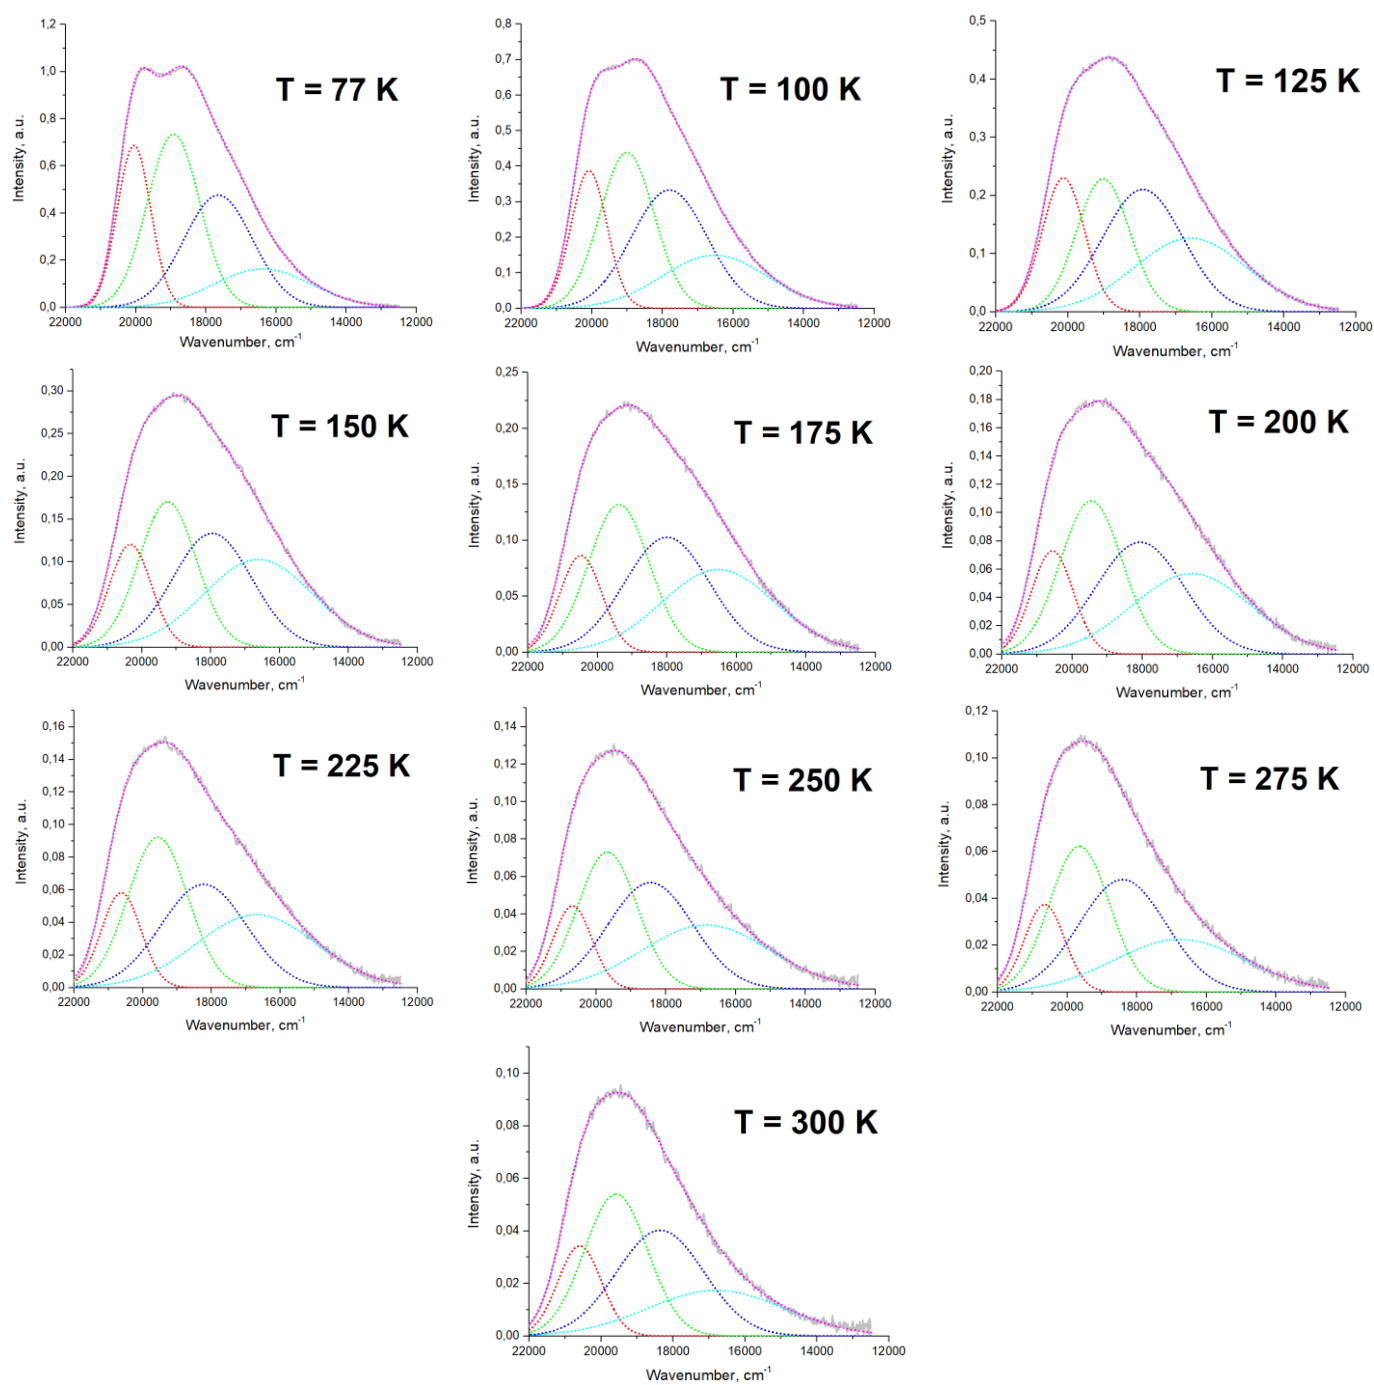

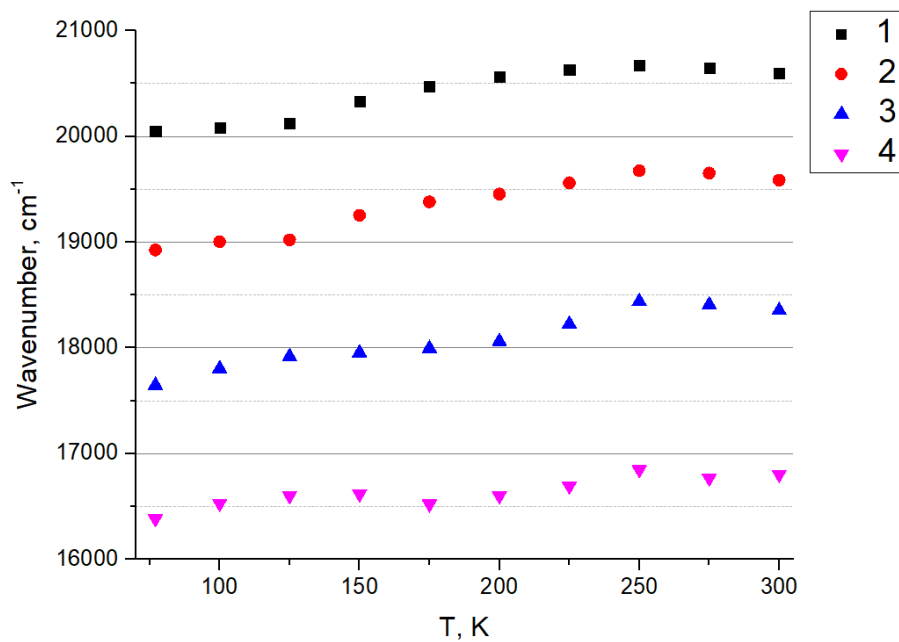

Figure S14. Temperature dependence of the maxima of the Gauss functions for the complex  $[\text{CuL}^2\text{I}]_n$ .

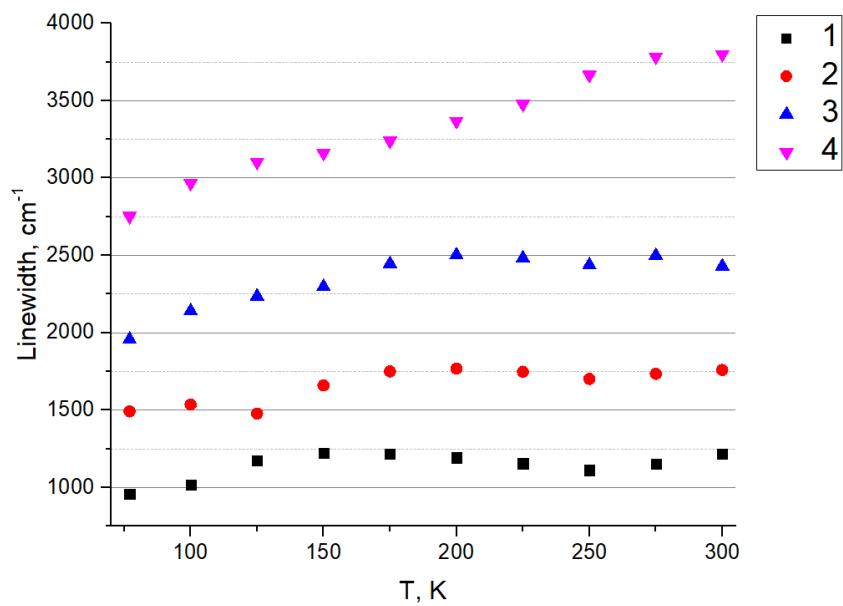

Figure S15. Temperature dependence of the linewidth of the Gauss functions for the complex  $[\text{CuL}^2\text{I}]_n$ .

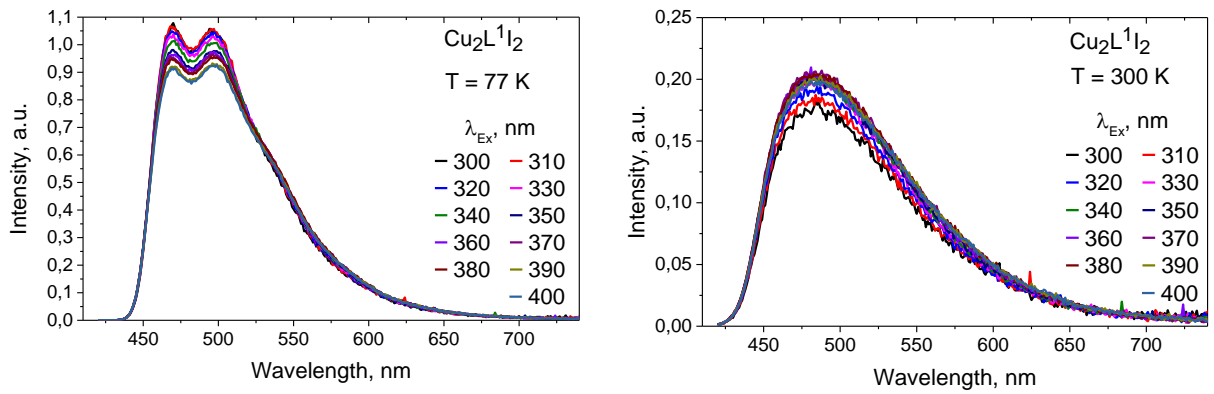

Figure S16. Dependence of the photoluminescence of the complex  $[\text{Cu}_2\text{L}^1\text{I}_2]_n$  on the excitation wavelength.

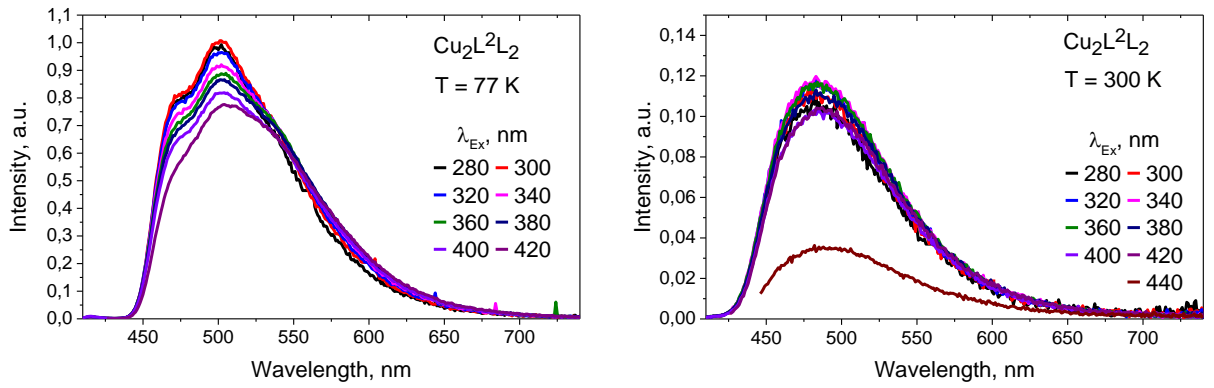

Figure S17. Dependence of the photoluminescence of the complex  $[\text{Cu}_2\text{L}^2\text{I}_2]_n$  on the excitation wavelength.

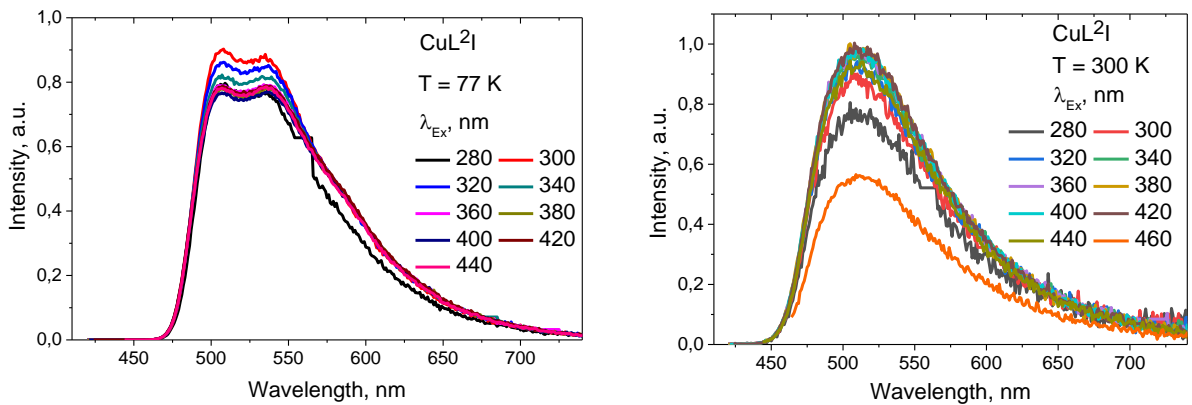

Figure S18. Dependence of the photoluminescence of the complex  $[\text{CuL}^2\text{I}]_n$  on the excitation wavelength.

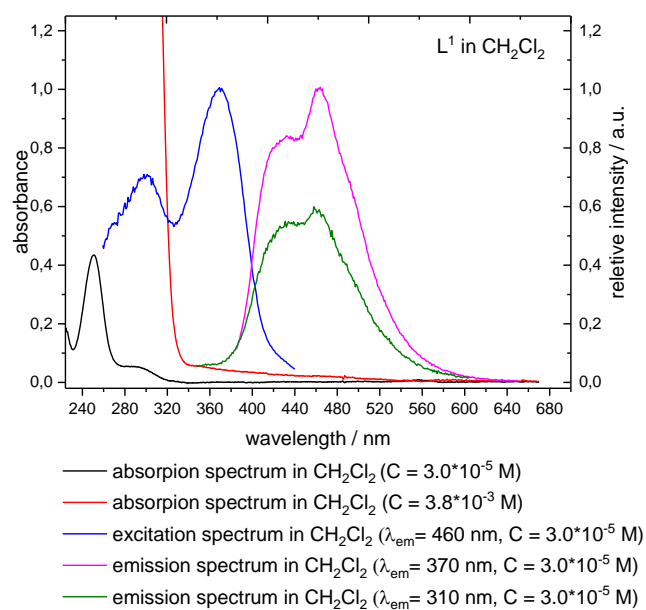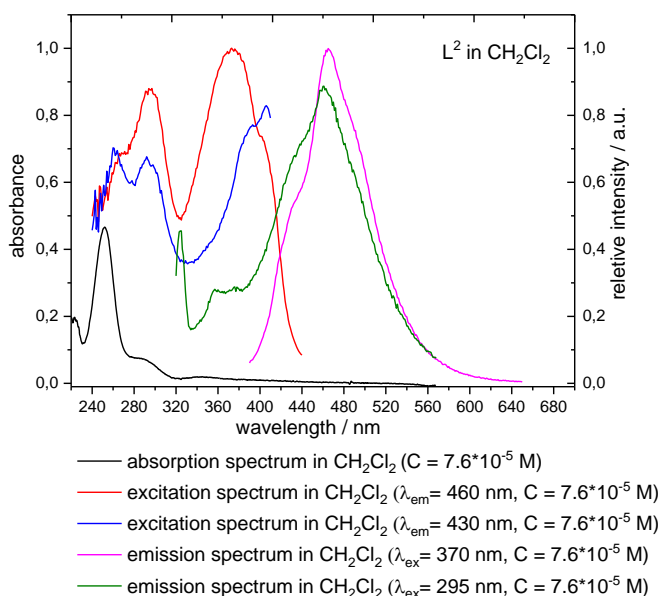

Figure S19. Absorption, excitation and emission spectra of  $\text{L}^1$  and  $\text{L}^2$  in  $\text{CH}_2\text{Cl}_2$ .

Free ligands in  $\text{CH}_2\text{Cl}_2$  solutions absorb at *ca.* 255, 290 and 360 nm (a weak absorption band). In the excitation spectra there are two bands near 300 nm and 370 nm. The ligands luminesce in the blue region of the spectrum with the maximum near 470 nm and a shoulder in the 400 – 440 nm range.

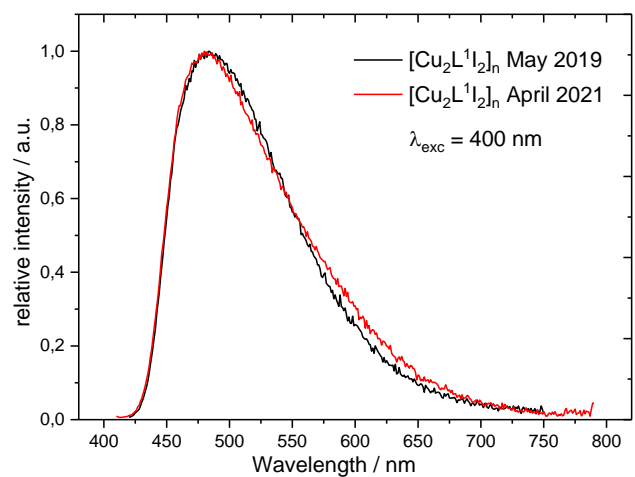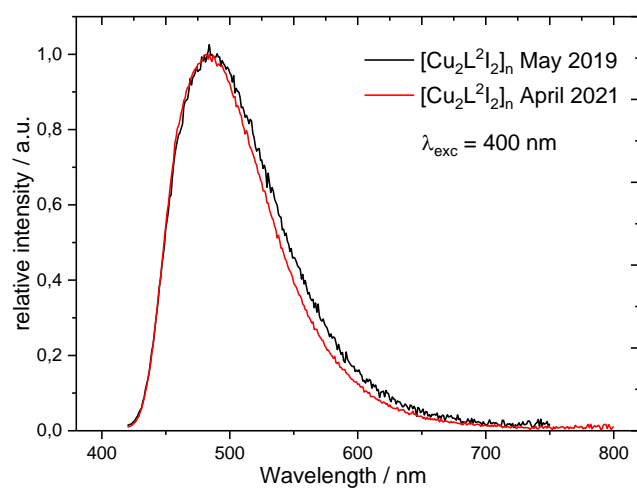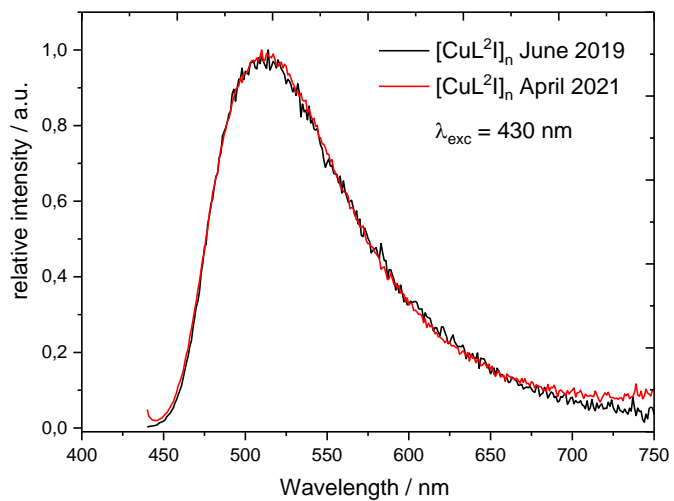

Figure S20. Reproducibility of emission spectra of the complexes.

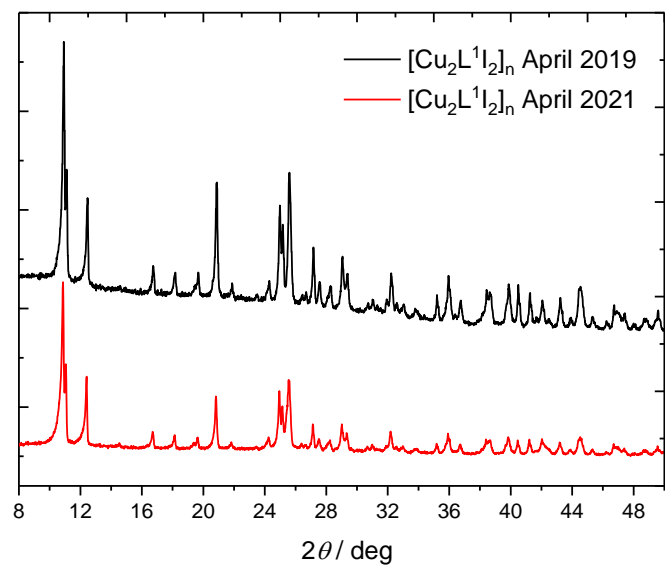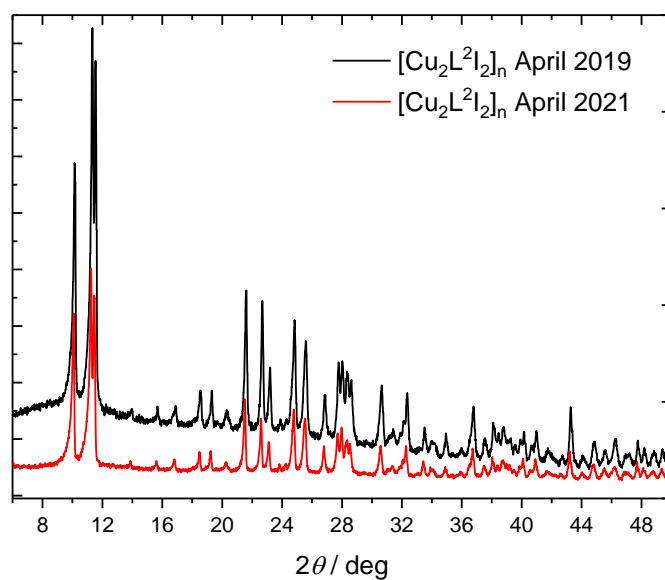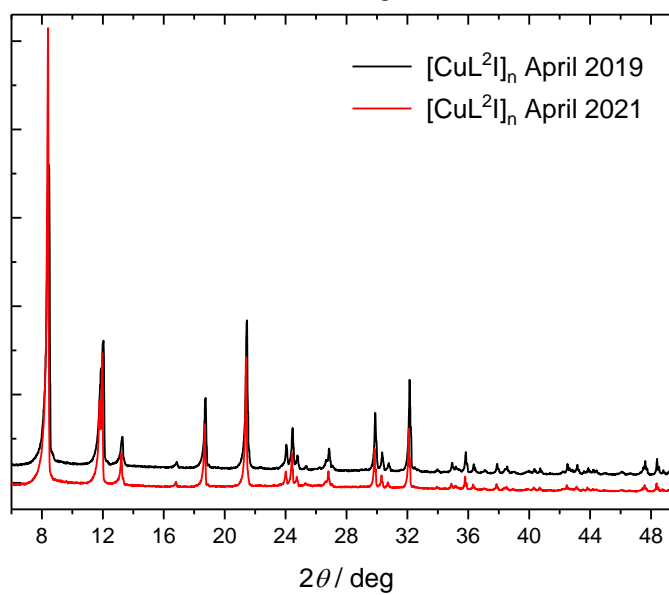

Figure S21. Reproducibility of X-ray powder diffraction patterns of the complexes.

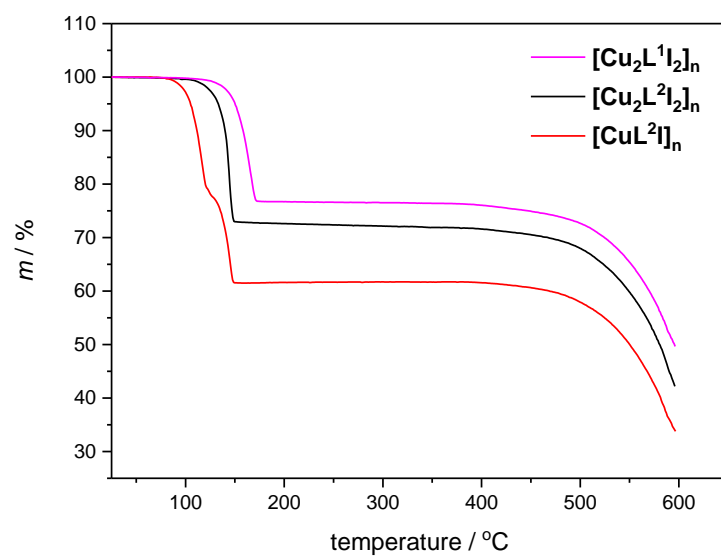

Figure S22. TGA data for the complexes.
